# Supplementary material for: Two-photon fluorescent turn-on probes for highly efficient detection and profiling of thiols in live cells and tissues
Source: publisher site journal article supplement (doi:10.1515/hsz-2021-0189), 2021-09-09
Supplement: Supplementary file 1 [file j_hsz-2021-0189_suppl_002.xlsx]

## Sheet: Sheet1
Table. TP-1 labeled peptides in HeLa, HeLa S3 and NCIH460 cell lines. Each cell line was given two biological replicates, red-colored residues possess various functions.
Annotated Sequence	Protein ID	Gene ID	Protein Name	Modifications	Modification Site in Protein	Qvality PEP	Qvality q-value	# PSMs	HeLa-1	HeLa-2	HeLa S3-1	HeLa S3-2	NCIH460-1	NCIH460-2	Function
[K].GQVCLPVISAENWKPATK.[T]	P68036	UBE2L3	Ubiquitin-conjugating enzyme E2 L3	1xTP-1 [C4]	86	7.94152e-12	6.06648e-05	6	High	High	High	High	High	High	Active site
[K].ASVGFGGSCFQK.[D]	O60701	UGDH	UDP-gluc	1xTP-1 [C9]	276	0.000418473	6.06648e-05	2	Not Found	Not Found	Not Found	Not Found	High	High	Active site
[K].KGVLFGVPGAFTPGCSK.[T]	P30044	PRDX5	Peroxiredoxin-5, mitochondrial	1xTP-1 [C15]	100	2.30352e-08	6.06648e-05	4	Peak Found	High	High	High	High	Not Found	Active site
[K].GVLFGVPGAFTPGCSK.[T]	P30044	PRDX5	Peroxiredoxin-5, mitochondrial	1xTP-1 [C14]	100	6.09071e-05	6.06648e-05	5	High	High	High	Peak Found	High	High	Active site
[KR].IYHPNINSNGSICLDILR.[S]	P51668	UBE2D1	Ubiquitin-conjugating enzyme E2 D1	1xTP-1 [C13]	85	0.0178195	0.00168587	1	Not Found	Not Found	Not Found	High	Not Found	Not Found	Active site
[R].DFTPVCTTELGR.[A]	P30041	PRDX6	Peroxiredoxin-6	1xTP-1 [C6]	47	0.00522427	0.000852955	1	Not Found	Not Found	Not Found	Not Found	High	Not Found	Active site
[K].GLCRPENIGYPFLVSVPASR.[L]	O94966	USP19	Ubiquitin carboxyl-terminal hydrolase 19	1xTP-1 [C3]	833	0.0569192	0.00452395	1	Not Found	High	Not Found	Not Found	Not Found	Not Found	Metal binding
[K].GVLFYGPPGCGK.[T]	P55072	VCP	Transitional endoplasmic reticulum ATPase	1xTP-1 [C10]	522	6.39439e-05	6.06648e-05	5	High	High	High	Peak Found	High	High	Nucleotide binding
[K].GVLLYGPPGCGK.[T]	Q8NBU5	ATAD1	ATPase family AAA domain-containing protein 1	1xTP-1 [C10]	137	0.00273064	0.000388332	3	Peak Found	High	Not Found	Peak Found	High	High	Nucleotide binding
[K].IVLAGCVPQAQPR.[Q]	Q5VV42	CDKAL1	Threonylcarbamoyladen	1xTP-1 [C6]	138	0.00659033	0.000949718	2	Not Found	Not Found	Not Found	Not Found	High	High	Metal binding
[K].KFPFCDGAHTK.[H]	Q9NZ45	CISD1	CDGSH iron-sulfur domain-containing protein 1	1xTP-1 [C5]	83	0.0132993	0.00134403	2	Peak Found	Peak Found	Peak Found	High	Peak Found	High	Metal binding
[K].KNCTYTQVQTR.[S]	Q15560	TCEA2	Transcription elongation factor A protein 2	1xTP-1 [C3]	271	0.000384646	6.06648e-05	7	High	High	Peak Found	High	High	High	Zinc finger
[K].LLVGNKCDLTTKK.[V]	P62820	RAB1A	Ras-related protein Rab-1A	1xTP-1 [C7]	126	0.000256684	6.06648e-05	6	High	High	High	High	High	High	Nucleotide binding
[K].MILGNKCDVNDKR.[Q]	P61006	RAB8A	Ras-related protein Rab-8A	1xTP-1 [C7]	123	0.000359975	6.06648e-05	5	High	High	High	Not Found	High	High	Nucleotide binding
[K].NTHCSSLPHYQK.[L]	P43243	MATR3	Matrin-3	1xTP-1 [C4]	821	0.007154	0.000949718	9	High	High	High	High	High	High	Zinc finger
[K].VCLIGCGFSTGYGAAVK.[T]	P40394	ADH7	All-trans-retinol dehydrogenase [NAD(+)] ADH7	1xCarbamidomethyl [C2]; 1xTP-1 [C6]	186	0.118708	0.00856683	2	Not Found	High	High	Peak Found	Peak Found	Peak Found	Metal binding
[R].FQNTIPCLGR.[E]	P21580	TNFAIP3	Tumor necr	1xTP-1 [C7]	657	0.0627544	0.00508271	1	Not Found	Not Found	High	Not Found	Not Found	Not Found	Metal binding
[R].GVEICIATPGR.[L]	Q92841	DDX17	Probable ATP-dependent RNA helicase DDX17	1xTP-1 [C5]	221	0.00968806	0.00109138	2	Peak Found	Peak Found	Peak Found	Peak Found	High	High	Nucleotide binding
[R].GVLMYGPPGCGK.[T]	P43686	PSMC4	26S proteasome regulatory subunit 6B	1xTP-1 [C10]	210	3.00696e-05	6.06648e-05	3	Not Found	Peak Found	High	High	Not Found	High	Nucleotide binding
[R].GVLMYGPPGCGK.[T]	P43686	PSMC4	26S proteasome regulatory subunit 6B	1xOxidation [M4]; 1xTP-1 [C10]	210	0.006786	0.000949718	2	High	Peak Found	Peak Found	High	Peak Found	Peak Found	Nucleotide binding
[R].KAVLCQR.[C]	P47224	RABIF	Guanine nucleotide exchange factor MSS4	1xTP-1 [C5]	23	0.138644	0.00961207	1	Peak Found	Peak Found	Peak Found	Peak Found	Peak Found	High	Metal binding
[R].IIAQCLNK.[M]	O75306	NDUFS2	NADH dehydrogenase [ubiquinone] iron-sulfur protein 2, mitochondrial	1xTP-1 [C5]	347	0.043335	0.00365501	2	High	Not Found	Peak Found	Not Found	High	Not Found	Metal binding
[R].SITNTTVCTK.[C]	Q15637	SF1	Splicing factor 1	1xTP-1 [C8]	279	0.0264003	0.00242546	2	High	Peak Found	Peak Found	Not Found	Peak Found	High	Zinc finger
[R].KVFANPEDCVAFGK.[G]	P10620	MGST1	Microsomal glutathione S-transferase 1	1xTP-1 [C9]	50	0.000447095	6.06648e-05	4	High	Peak Found	High	Peak Found	High	High	Site
[R].KVFANPEDCVAFGKGENAK.[K]	P10620	MGST1	Microsomal glutathione S-transferase 1	1xTP-1 [C9]	50	0.0164255	0.00158855	1	Peak Found	High	Peak Found	Peak Found	Peak Found	Not Found	Site
[R].LHICDHFTR.[G]	Q7Z2W4	ZC3HAV1	Zinc finger CCCH-type antiviral protein 1	1xTP-1 [C4]	174	0.0142349	0.00144184	1	Not Found	High	Not Found	Not Found	Not Found	Not Found	Zinc finger
[R].SKKFPFCDGAHTK.[H]	Q9NZ45	CISD1	CDGSH iron-sulfur domain-containing protein 1	1xTP-1 [C7]	83	0.0639915	0.00526731	8	High	High	High	Peak Found	High	High	Metal binding
[R].VIACFDSLK.[G]	Q5VZF2	MBNL2	Muscleblind-like protein 2	1xTP-1 [C4]	53	0.0584197	0.004759	1	Peak Found	Peak Found	Peak Found	High	Peak Found	Peak Found	Zinc finger
[R].VLGPCSDILKR.[N]	P10644	PRKAR1A	cAMP-dependent protein kinase type I-alpha regulatory subunit	1xTP-1 [C5]	362	0.083013	0.00676266	2	Not Found	Not Found	High	Peak Found	Not Found	High	Nucleotide binding
[R].VVACNLYPFVK.[T]	P31939	ATIC	Bifunctional purine bi	1xTP-1 [C4]	101	0.00741116	0.00100143	3	Peak Found	Peak Found	High	Not Found	High	High	Nucleotide binding
[RK].KKNCTYTQVQTR.[S]	Q15560	TCEA2	Transcription elongation factor A protein 2	1xTP-1 [C4]	271	0.00244759	0.000388332	6	High	High	High	High	High	Peak Found	Zinc finger
[R].VVNCAR.[G]	O43175	PHGDH	D-3-phosphoglycerate dehydrogenase	1xTP-1 [C4]	234	0.13954	0.0096951	1	Peak Found	Peak Found	Peak Found	Peak Found	High	Peak Found	Nucleotide binding
[K].ALGLVTPAGVLLAGPPGCGK.[T]	O15381	NVL	Nuclear valosin-containing protein-like	1xTP-1 [C18]	626	2.35877e-06	6.06648e-05	5	High	High	High	High	Peak Found	High	Nucleotide binding
[-].MATAVSRPCAGR.[S]	Q9BTX1	NDC1	Nucleoporin NDC1	1xMet-loss [N-Term]; 1xTP-1 [C9]	9	0.00890794	0.00109138	1	Peak Found	Peak Found	Peak Found	Peak Found	Peak Found	High
[-].MKLNISFPATGCQK.[L]	P62753	RPS6	40S ribosomal protein S6	1xTP-1 [C12]	12	2.35711e-05	6.06648e-05	4	High	Peak Found	High	High	High	Peak Found
[-].MKLNISFPATGCQK.[L]	P62753	RPS6	40S ribosomal protein S6	1xOxidation [M1]; 1xTP-1 [C12]	12	6.52222e-06	6.06648e-05	6	High	High	High	High	High	High
[-].MLPDCLSAEGELR.[C]	Q8WV74	NUDT8	Nucleoside diphosphate-linked moiety X motif 8	1xMet-loss [N-Term]; 1xTP-1 [C5]	5	0.135114	0.00944107	1	High	Not Found	Not Found	Not Found	Not Found	Not Found
[-].MREIVHIQAGQCGNQIGTK.[F]	Q9BUF5	TUBB6	Tubulin beta-6 chain	1xTP-1 [C12]	12	3.54734e-06	6.06648e-05	2	Not Found	Not Found	Not Found	Not Found	High	High
[-].MREIVHIQAGQCGNQIGTK.[F]	Q9BUF5	TUBB6	Tubulin beta-6 chain	1xOxidation [M1]; 1xTP-1 [C12]	12	0.000571778	6.06648e-05	4	Not Found	High	Not Found	High	High	High
[-].MREIVHLQAGQCGNQIGAK.[F]	P68371	TUBB4B	Tubulin beta-4B chain	1xTP-1 [C12]	12	1.85115e-10	6.06648e-05	6	High	High	High	High	High	High
[-].MREIVHLQAGQCGNQIGAK.[F]	Q13885	TUBB2A	Tubulin beta-2A chain	1xOxidation [M1]; 1xTP-1 [C12]	12	1.15705e-07	6.06648e-05	11	High	High	High	High	High	High
[-].MVLCPVIGK.[L]	O95671	ASMTL	Probable bifunctional dTTP/UTP pyroph	1xMet-loss [N-Term]; 1xTP-1 [C4]	4	0.102227	0.00770983	2	Peak Found	Not Found	Not Found	Not Found	High	High
[K].AAGCNIPVASVAAGFPAGQTHLK.[T]	Q9Y315	DERA	Deoxyribose-phosphate aldolase	1xTP-1 [C4]	118	0.000179568	6.06648e-05	1	Not Found	Not Found	Peak Found	Not Found	Peak Found	High
[K].AAHLCAEAALR.[L]	Q9UQ80	PA2G4	Proliferation-associated protein 2G4	1xTP-1 [C5]	149	0.0247678	0.00222929	2	Peak Found	Peak Found	Not Found	Peak Found	High	High
[K].AAMCKPLMQNR.[G]	Q14202	ZMYM3	Zinc finger MYM-type protein 3	1xTP-1 [C4]	835	0.00149367	0.000126086	1	Not Found	Not Found	Not Found	Not Found	Not Found	High
[K].AAVPSIKFCLDNGAK.[S]	P00558	PGK1	Phosphoglycerate kinase 1	1xTP-1 [C9]	50	4.2069e-06	6.06648e-05	4	High	High	Peak Found	Peak Found	High	High
[K].ACIPVGLLGK.[D]	Q96GQ7	DDX27	Probable ATP-dependent RNA helicase DDX27	1xTP-1 [C2]	248	0.000452502	6.06648e-05	6	High	High	High	High	High	High
[K].ACIPYLKK.[S]	Q6YN16	HSDL2	Hydroxysteroid dehydrogenase-like protein 2	1xTP-1 [C2]	136	0.0561836	0.00442998	1	Peak Found	Peak Found	Not Found	Not Found	High	Peak Found
[K].ACLENLGLK.[H]	P36952	SERPINB5	Serpin B5	1xTP-1 [C2]	287	0.0132176	0.00128937	5	High	High	High	High	High	Peak Found
[K].ACTILLR.[G]	P49368	CCT3	T-complex protein 1 subunit gamma	1xTP-1 [C2]	372	0.0814087	0.0067224	3	High	High	High	Peak Found	Peak Found	Peak Found
[K].AFQYVETHGEVCPANWTPDSPTIKPSPAASK.[E]	P30048	PRDX3	Thioredoxin-dependent peroxide reductase, mitochondrial	1xTP-1 [C12]	229	9.47274e-11	6.06648e-05	2	Not Found	High	Not Found	Not Found	Not Found	High
[K].AGFAGDQIPKYCFPNYVGRPK.[H]	P61163	ACTR1A	Alpha-centractin	1xTP-1 [C12]	34	9.29242e-08	6.06648e-05	6	High	High	High	High	High	High
[K].AGIICQLNAR.[T]	P33991	MCM4	DNA replication licensing factor MCM4	1xTP-1 [C5]	605	0.0803564	0.00659109	2	Peak Found	Peak Found	High	Peak Found	High	Peak Found
[K].AGKLCVPAMNVNDSVTK.[Q]	O43865	AHCYL1	S-adenosylhomocysteine hydrolase-like protein 1	1xTP-1 [C5]	272	3.96229e-09	6.06648e-05	3	Peak Found	Peak Found	High	High	High	Peak Found
[K].AGKLCVPAMNVNDSVTK.[Q]	O43865	AHCYL1	S-adenosylhomocysteine hydrolase-like protein 1	1xOxidation [M9]; 1xTP-1 [C5]	272	1.57904e-08	6.06648e-05	3	High	High	Peak Found	Peak Found	Peak Found	High
[K].AHVVPCFDASK.[V]	P21333	FLNA	Filamin-A	1xTP-1 [C6]	1157	0.0523063	0.00430082	4	High	High	Not Found	High	High	Not Found
[K].AIELNPANAVYFCNR.[A]	O43765	SGTA	Small glutamine-rich tetratricopeptide repeat-containing protein alpha	1xTP-1 [C13]	129	0.000878281	0.000126086	3	High	High	Not Found	Peak Found	High	Peak Found
[K].AKIGLIQFCLSAPK.[T]	P50991	CCT4	T-complex protein 1 subunit delta	1xTP-1 [C9]	252	0.000108509	6.06648e-05	4	High	Peak Found	High	Peak Found	High	High
[K].AKLVILANNCPALR.[K]	P62888	RPL30	60S ribosomal protein L30	1xTP-1 [C10]	52	8.42959e-08	6.06648e-05	4	High	High	Not Found	High	High	Not Found
[K].AKLVILANNCPALRK.[S]	P62888	RPL30	60S ribosomal protein L30	1xTP-1 [C10]	52	4.00831e-07	6.06648e-05	1	Not Found	Not Found	Not Found	Not Found	High	Not Found
[K].ALAGCDFLTISPK.[L]	P37837	TALDO1	Transaldolase	1xTP-1 [C5]	250	0.0897529	0.0072515	1	Peak Found	Peak Found	Peak Found	Peak Found	High	Peak Found
[K].ALANVNIGSLICNVGAGGPAPAAGAAPAGGPAPSTAAAPAEEK.[K]	P05386	RPLP1	60S acidic ribosomal protein P1	1xTP-1 [C12]	61	1.50347e-07	6.06648e-05	3	High	High	Not Found	Not Found	High	Not Found
[K].ALGKHPVSCKDTPGFIVNR.[L]	Q16836	HADH	Hydroxyacyl-coenzyme A dehydrogenase, mitochondrial	1xTP-1 [C9]	211	0.00014789	6.06648e-05	4	High	Peak Found	High	Peak Found	High	High
[K].ALLCKPITQTK.[A]	Q5VZL5	ZMYM4	Zinc finger MYM-type protein 4	1xTP-1 [C4]	948	0.0317911	0.00296632	2	Not Found	Peak Found	High	Peak Found	Peak Found	High
[K].ALRPGDPGFCAR.[A]	Q96ST2	IWS1	Protein IWS1 homolog	1xTP-1 [C10]	749	0.00465582	0.000852955	3	Peak Found	High	Peak Found	Not Found	High	High
[K].ALSCAQQAQRPQLQR.[Q]	Q96HA7	TONSL	Tonsoku-like protein	1xTP-1 [C4]	420	0.00378707	0.000698603	2	Not Found	Peak Found	Peak Found	Peak Found	High	High
[K].ALTDAGCNLNPLQYIK.[Q]	Q8WVM8	SCFD1	Sec1 family domain-containing protein 1	1xTP-1 [C7]	485	0.00299366	0.00051845	2	Not Found	Not Found	Not Found	Not Found	High	High
[K].ANPGYKWCPTTNKPVK.[S]	Q8WY36	BBX	HMG box transcription factor BBX	1xTP-1 [C8]	150	0.00299366	0.00051845	5	High	High	High	High	Not Found	High
[K].APLVCLPVFVSR.[D]	Q9H0W9	C11orf54	Ester hydrolase C11orf54	1xTP-1 [C5]	249	0.000847538	0.000126086	5	High	High	High	High	High	Peak Found
[K].AQCPIVER.[L]	P46782	RPS5	40S ribosomal protein S5	1xTP-1 [C3]	66	0.0264003	0.00242546	5	High	High	High	Peak Found	High	High
[K].AQNTWGCGNSLR.[T]	P02545	LMNA	Prelamin-A/C	1xTP-1 [C7]	522	0.000832565	0.000126086	5	High	High	High	High	Not Found	High
[K].ASLLSAPPCR.[D]	Q9NZM1	MYOF	Myoferlin	1xTP-1 [C9]	1425	0.000249037	6.06648e-05	3	High	Peak Found	High	Peak Found	Peak Found	High
[K].ATCAPQHGAPGPGPADASK.[V]	P21333	FLNA	Filamin-A	1xTP-1 [C3]	2543	1.01227e-08	6.06648e-05	8	High	High	High	High	Peak Found	High
[K].ATFCLPILGVK.[K]	O95478	NSA2	Ribosome biogenesis protein NSA2 homolog	1xTP-1 [C4]	193	0.00130501	0.000126086	6	High	High	High	Peak Found	High	High
[K].ATILDLSCNK.[L]	Q96AG4	LRRC59	Leucine-rich repeat-containing protein 59	1xTP-1 [C8]	48	0.00108061	0.000126086	5	High	High	High	High	High	Peak Found
[K].ATSCFPRPMTPR.[D]	Q14980	NUMA1	Nuclear mitotic apparatus protein 1	1xTP-1 [C4]	2009	0.030394	0.00282039	1	Peak Found	Peak Found	Peak Found	Not Found	Peak Found	High
[K].ATSCFPRPMTPR.[D]	Q14980	NUMA1	Nuclear mitotic apparatus protein 1	1xOxidation [M9]; 1xTP-1 [C4]	2009	0.0644093	0.00526731	2	Peak Found	Peak Found	Peak Found	High	Peak Found	High
[K].ATVFLNPAACK.[G]	Q53H12	AGK	Acylglycerol kinase, mitochondrial	1xTP-1 [C10]	72	0.00317051	0.000582961	4	High	Peak Found	Peak Found	High	High	High
[K].ATYDKLCKEVPNYK.[L]	P62851	RPS25	40S ribosomal protein S25	1xTP-1 [C7]	59	0.0733611	0.00595785	3	High	High	High	Peak Found	Peak Found	Peak Found
[K].AVFPCPSEPALSK.[N]	O14802	POLR3A	DNA-directed RNA polymerase III subunit RPC1	1xTP-1 [C5]	934	0.0880182	0.00717011	1	Peak Found	Peak Found	Peak Found	Not Found	Peak Found	High
[K].AVGDGIVLCK.[M]	P13797	PLS3	Plastin-3	1xTP-1 [C9]	167	0.000233	6.06648e-05	2	High	High	Peak Found	Peak Found	Peak Found	Peak Found
[K].AVLFCLSEDKK.[N]	P23528	CFL1	Cofilin-1	1xTP-1 [C5]	39	0.0710129	0.00582357	1	High	Peak Found	Peak Found	Not Found	Peak Found	Peak Found
[K].AVQCLNTSSK.[E]	Q5T4S7	UBR4	E3 ubiquitin-protein ligase UBR4	1xTP-1 [C4]	2554	0.0199594	0.00189343	2	Peak Found	Peak Found	Peak Found	Peak Found	High	High
[K].AVYTQDCPLAAAK.[A]	P49588	AARS1	Alanine--tRNA ligase, cytoplasmic	1xTP-1 [C7]	671	0.0223702	0.00208319	1	Not Found	Not Found	High	Not Found	Not Found	Not Found
[K].CGHTNNLRPK.[K]	P62987	UBA52	Ubiquitin-60S rib	1xTP-1 [C1]	115	0.000988853	0.000126086	11	High	High	High	High	High	High
[K].CHTPPLYR.[M]	Q02543	RPL18A	60S ribosomal protein L18a	1xTP-1 [C1]	22	0.0016692	0.000195391	4	High	High	Peak Found	High	Peak Found	High
[K].DAAGLECKPRPLHK.[T]	Q9BXP5	SRRT	Serrate RNA effector molecule homolog	1xTP-1 [C7]	412	0.0619429	0.00503723	3	High	Peak Found	High	Peak Found	High	Peak Found
[K].DGNASGTTLLEALDCILPPTRPTDKPLR.[L]	P68104	EEF1A1	Elongation factor 1-alpha 1	1xTP-1 [C15]	234	9.78611e-05	6.06648e-05	5	High	High	High	High	Peak Found	High
[K].DGNASGTTLLEALDCILPPTRPTDKPLRLPLQDVYK.[I]	P68104	EEF1A1	Elongation factor 1-alpha 1	1xTP-1 [C15]	234	4.18819e-11	6.06648e-05	4	High	High	Not Found	High	Not Found	High
[K].DKWLCPLSGKK.[F]	Q9BXP5	SRRT	Serrate RNA effector molecule homolog	1xTP-1 [C5]	715	0.0468407	0.00408505	5	High	High	High	High	High	Not Found
[K].DNGNGTYSCSYVPRKPVK.[H]	P21333	FLNA	Filamin-A	1xTP-1 [C9]	733	0.104921	0.00793531	1	Not Found	Not Found	Not Found	High	Not Found	Not Found
[K].DSNNLCLHFNPR.[F]	P09382	LGALS1	Galectin-1	1xTP-1 [C6]	43	0.00401045	0.000753666	5	High	High	High	High	Not Found	High
[K].DVLFLKDCVGPEVEK.[A]	P00558	PGK1	Phosphoglycerate kinase 1	1xTP-1 [C8]	99	0.00559964	0.000852955	2	Peak Found	High	Peak Found	Peak Found	High	Not Found
[K].EAIEGTYIDKKCPFTGNVSIR.[G]	P62280	RPS11	40S ribosomal protein S11	1xTP-1 [C12]	60	0.000261384	6.06648e-05	2	Not Found	Not Found	Not Found	High	Not Found	High
[K].EALPVSLPQIPCLSSFK.[I]	Q9UHI6	DDX20	Probable ATP-dependent RNA helicase DDX20	1xTP-1 [C12]	577	0.0639915	0.00526731	3	Peak Found	High	High	High	Peak Found	Peak Found
[K].ELEKVCNPIITK.[L]	P11142	HSPA8	Heat shock cognate 71 kDa protein	1xTP-1 [C6]	603	0.104241	0.00793531	3	High	Not Found	Not Found	High	High	Not Found
[K].ELEQVCNPIISGLYQGAGGPGPGGFGAQGPK.[G]	P0DMV9	HSPA1B	Heat shock 70 kDa protein 1B	1xTP-1 [C6]	603	2.09555e-20	6.06648e-05	6	High	High	High	High	High	High
[K].ELTSTCSPIISKPKPK.[V]	P34932	HSPA4	Heat shock 70 kDa protein 4	1xTP-1 [C6]	779	1.57854e-07	6.06648e-05	6	High	High	High	High	High	High
[K].ENFSCLTR.[L]	P40925	MDH1	Malate dehydrogenase, cytoplasmic	1xTP-1 [C5]	154	0.0339024	0.00314487	1	Peak Found	Peak Found	Not Found	Peak Found	High	Not Found
[K].FCLDNGAK.[S]	P00558	PGK1	Phosphoglycerate kinase 1	1xTP-1 [C2]	50	0.0576645	0.00466654	4	High	Peak Found	High	High	High	Peak Found
[K].FDTGNLCMVTGGANLGR.[I]	P62701	RPS4X	40S ribosomal protein S4, X isoform	1xTP-1 [C7]	181	3.72445e-06	6.06648e-05	4	High	High	Not Found	Not Found	High	High
[K].FDTGNLCMVTGGANLGR.[I]	P62701	RPS4X	40S ribosomal protein S4, X isoform	1xOxidation [M8]; 1xTP-1 [C7]	181	5.16821e-05	6.06648e-05	2	Not Found	Not Found	Not Found	Not Found	High	High
[K].FGAQLQCVTGPQATR.[G]	O15031	PLXNB2	Plexin-B2	1xTP-1 [C7]	948	0.00106791	0.000126086	1	High	Not Found	Not Found	Not Found	Not Found	Not Found
[K].FHTVSGSKCEIKVAQPK.[E]	Q99729	HNRNPAB	Heterogeneous nuclear ribonucleoprotein A/B	1xTP-1 [C9]	224	0.00974654	0.00109138	1	Peak Found	High	Peak Found	Peak Found	Peak Found	Peak Found
[K].FKDPNCVGTVLASRPHTLDGR.[N]	Q96EP5	DAZAP1	DAZ-associated protein 1	1xTP-1 [C6]	63	0.00186458	0.000265778	3	Not Found	Not Found	High	High	Not Found	High
[K].FNAVLCSR.[S]	P50995	ANXA11	Annexin A11	1xTP-1 [C6]	384	0.118708	0.00856683	1	Peak Found	Peak Found	Peak Found	Peak Found	High	Peak Found
[K].FRISLGLPVGAVINCADNTGAK.[N]	P62829	RPL23	60S ribosomal protein L23	1xTP-1 [C15]	28	1.23723e-07	6.06648e-05	5	Peak Found	High	High	High	High	High
[K].FSAIQCAAAVPR.[A]	Q15054	POLD3	DNA polymerase delta subunit 3	1xTP-1 [C6]	137	0.00447229	0.000852955	1	Peak Found	Not Found	Peak Found	Peak Found	Not Found	High
[K].FSPAGPILSIRVCR.[D]	P11940	PABPC1	Polyadenylate-binding protein 1	1xTP-1 [C13]	43	0.0398374	0.00331644	2	Not Found	Not Found	Not Found	Not Found	High	High
[K].FTFIEKCNNPR.[S]	P40227	CCT6A	T-complex protein 1 subunit zeta	1xTP-1 [C7]	366	8.5614e-05	6.06648e-05	1	Not Found	High	Peak Found	Not Found	Peak Found	Peak Found
[K].FTVNLSGCPR.[N]	Q9BTE3	MCMBP	Mini-chrom	1xTP-1 [C8]	396	0.00651375	0.000949718	3	Peak Found	Peak Found	High	Peak Found	High	High
[K].FVLSGANIMCPGLTSPGAK.[L]	Q9ULC4	MCTS1	Malignant T-cell-amplified sequence 1	1xTP-1 [C10]	113	8.7721e-05	6.06648e-05	5	High	High	High	Not Found	High	High
[K].GAGNPQASTLALQSNITQCLLGQPWPLNEAQVQASVVK.[V]	Q13428	TCOF1	Treacle protein	1xTP-1 [C19]	1298	0.00501754	0.000852955	1	Not Found	Not Found	High	Not Found	Not Found	Not Found
[K].GCGTVLLSGPR.[K]	Q07020	RPL18	60S ribosomal protein L18	1xTP-1 [C2]	134	0.00180061	0.000195391	2	Peak Found	Peak Found	High	High	Peak Found	Peak Found
[K].GCGTVLLSGPRK.[G]	Q07020	RPL18	60S ribosomal protein L18	1xTP-1 [C2]	134	0.0363927	0.00318806	1	Not Found	Not Found	High	Not Found	Not Found	Peak Found
[K].GCPPVFNTLR.[S]	Q9BXJ9	NAA15	N-alpha-acetyltransferase 15, NatA auxiliary subunit	1xTP-1 [C2]	322	0.00183233	0.000195391	2	Peak Found	Not Found	Peak Found	Not Found	High	High
[K].GFGYKGSCFHR.[I]	P62937	PPIA	Peptidyl-prolyl cis-trans isomerase A	1xTP-1 [C8]	52	0.0183885	0.00168587	3	Peak Found	High	Peak Found	Peak Found	High	High
[K].GHFGPIHCVR.[F]	Q9Y3F4	STRAP	Serine-threonine kinase receptor-associated protein	1xTP-1 [C8]	270	0.000894059	0.000126086	3	Not Found	High	High	High	Peak Found	Not Found
[K].GHTSFVNSCYPAR.[R]	Q96DI7	SNRNP40	U5 small nuclear ribonucleoprotein 40 kDa protein	1xTP-1 [C9]	157	0.000571778	6.06648e-05	5	High	High	Not Found	High	High	High
[K].GIIDCVVR.[I]	P05141	SLC25A5	ADP/ATP translocase 2	1xTP-1 [C5]	57	0.136868	0.00952486	1	Not Found	Not Found	Peak Found	Not Found	Not Found	High
[K].GILLYGPPGCGK.[T]	P46459	NSF	Vesicle-fusing ATPase	1xTP-1 [C10]	264	2.3004e-05	6.06648e-05	4	High	High	High	High	Peak Found	Not Found
[K].GKCAVIK.[T]	P17980	PSMC3	26S proteasome regulatory subunit 6A	1xTP-1 [C3]	121	0.129978	0.00927602	2	Peak Found	High	High	Peak Found	Peak Found	Peak Found
[K].GKNCVAIAADRR.[F]	P49720	PSMB3	Proteasome subunit beta type-3	1xTP-1 [C4]	19	0.0121281	0.00124196	3	Peak Found	Peak Found	Peak Found	Peak Found	High	High
[K].GLGACTSRPIHPSK.[A]	Q9GZT8	NIF3L1	NIF3-like protein 1	1xTP-1 [C5]	148	0.0219482	0.00203653	4	High	High	Peak Found	Peak Found	High	High
[K].GLKDGTILCTLMNK.[L]	Q99439	CNN2	Calponin-2	1xTP-1 [C9]	61	0.0228006	0.00208319	3	High	Peak Found	Not Found	Not Found	High	High
[K].GLKDGTILCTLMNK.[L]	Q99439	CNN2	Calponin-2	1xOxidation [M12]; 1xTP-1 [C9]	61	0.0400959	0.00331644	2	Not Found	Not Found	Not Found	Not Found	High	High
[K].GLKDGTILCTLMNKLQPGSVPK.[I]	Q99439	CNN2	Calponin-2	1xTP-1 [C9]	61	1.41508e-08	6.06648e-05	2	High	Not Found	Not Found	Peak Found	Not Found	High
[K].GLLGCNIIPLQR.[-]	O00233	PSMD9	26S proteasome non-ATPase regulatory subunit 9	1xTP-1 [C5]	216	0.000334843	6.06648e-05	5	Not Found	High	High	High	High	High
[K].GLTLNCLGK.[K]	Q9BXJ9	NAA15	N-alpha-acetyltransferase 15, NatA auxiliary subunit	1xTP-1 [C6]	58	0.00229703	0.000388332	3	Not Found	High	High	Not Found	Not Found	High
[K].GLYGIKDDVFLSVPCILGQNGISDLVK.[V]	P00338	LDHA	L-lactate dehydrogenase A chain	1xTP-1 [C15]	293	0.0026532	0.000388332	3	Not Found	High	High	High	Not Found	Not Found
[K].GNCLPPLPLPR.[R]	Q9NRX2	MRPL17	39S ribosomal protein L17, mitochondrial	1xTP-1 [C3]	129	0.000779849	0.000126086	2	Peak Found	Peak Found	Peak Found	Peak Found	High	High
[K].GNPICSLHDQGAGGNGNVLK.[E]	O15067	PFAS	Phosphoglycerate kinase 1	1xTP-1 [C5]	512	0.0265695	0.00242546	1	Not Found	Not Found	Not Found	Not Found	Not Found	High
[K].GRPCKIVEMSTSK.[T]	P63241	EIF5A	Eukaryotic translation initiation factor 5A-1	1xTP-1 [C4]	38	3.7894e-05	6.06648e-05	10	High	High	High	High	High	High
[K].GRPCKIVEMSTSK.[T]	P63241	EIF5A	Eukaryotic translation initiation factor 5A-1	1xOxidation [M9]; 1xTP-1 [C4]	38	0.00164983	0.000195391	8	High	High	High	High	High	High
[K].GSELQLPFQACLK.[V]	Q6P2Q9	PRPF8	Pre-mRNA-processing-splicing factor 8	1xTP-1 [C11]	1896	0.00197608	0.000334782	4	Peak Found	High	High	Peak Found	Peak Found	High
[K].GVNTVFHCASPPPSSNNK.[E]	Q15738	NSDHL	Sterol-4-alpha-carboxylate 3-dehydrogenase, decarboxylating	1xTP-1 [C8]	104	3.40158e-08	6.06648e-05	4	High	High	Not Found	Not Found	High	High
[K].GVQFAPFSTCR.[V]	O00116	AGPS	Alkyldihydroxyacetoneph	1xTP-1 [C10]	565	0.00164983	0.000195391	4	High	High	Peak Found	High	High	Peak Found
[K].GVTIIGPATVGGIKPGCFK.[I]	P53396	ACLY	ATP-citrate synthase	1xTP-1 [C17]	633	1.30584e-05	6.06648e-05	4	High	High	High	High	Not Found	Not Found
[K].GYVVPNVDLPPLCSSR.[F]	Q96B26	EXOSC8	Exosome complex component RRP43	1xTP-1 [C13]	89	0.0158215	0.00154265	1	Peak Found	Peak Found	Peak Found	Peak Found	Peak Found	High
[K].HGEVCPAGWKPGSDTIKPDVQK.[S]	Q06830	PRDX1	Peroxiredoxin-1	1xTP-1 [C5]	173	5.03101e-13	6.06648e-05	14	High	High	High	High	High	High
[K].HRVIGSGCNLDSAR.[F]	P07195	LDHB	L-lactate dehydrogenase B chain	1xTP-1 [C8]	164	0.0021307	0.000388332	5	High	High	High	High	High	Peak Found
[K].HTGPGILSMANAGPNTNGSQFFICTAK.[T]	P62937	PPIA	Peptidyl-prolyl cis-trans isomerase A	1xTP-1 [C24]	115	5.02466e-09	6.06648e-05	5	High	High	High	Not Found	High	High
[K].HTGPGILSMANAGPNTNGSQFFICTAK.[T]	P62937	PPIA	Peptidyl-prolyl cis-trans isomerase A	1xOxidation [M9]; 1xTP-1 [C24]	115	4.18952e-12	6.06648e-05	6	High	High	High	High	High	High
[K].IACLDFSLQK.[T]	P17987	TCP1	T-complex protein 1 subunit alpha	1xTP-1 [C3]	236	0.00874976	0.00109138	2	Not Found	Not Found	Peak Found	High	High	Peak Found
[K].IAIKNCDGVPALVR.[L]	O60716	CTNND1	Catenin delta-1	1xTP-1 [C6]	450	0.00593406	0.000904544	4	High	High	High	Not Found	High	Peak Found
[K].IAILTCPFEPPKPK.[T]	P48643	CCT5	T-complex protein 1 subunit epsilon	1xTP-1 [C6]	253	2.47474e-05	6.06648e-05	6	High	High	High	High	High	Peak Found
[K].IAVAAQNCYK.[V]	P60174	TPI1	Triosephosphate isomerase	1xTP-1 [C8]	67	0.0366283	0.00318806	3	High	Peak Found	Peak Found	High	High	Peak Found
[K].ICANHYITPMMELKPNAGSDR.[A]	P43487	RANBP1	Ran-specific GTPase-activating protein	1xTP-1 [C2]	99	1.65042e-13	6.06648e-05	4	High	Not Found	High	Not Found	High	High
[K].ICAVGITK.[L]	P55060	CSE1L	Exportin-2	1xTP-1 [C2]	842	0.006707	0.000949718	1	Peak Found	Not Found	Peak Found	Not Found	Peak Found	High
[K].ICRDPQTPVLQTK.[H]	Q9ULW0	TPX2	Targeting protein for Xklp2	1xTP-1 [C2]	364	0.0189767	0.00173672	4	Not Found	High	High	High	Not Found	High
[K].IDPTLCR.[A]	P41091	EIF2S3	Eukaryotic translation initiation factor 2 subunit 3	1xTP-1 [C6]	348	0.12748	0.00919039	1	Peak Found	Peak Found	High	Peak Found	Peak Found	Peak Found
[K].IGKPHTVPCKVTGR.[C]	P15880	RPS2	40S ribosomal protein S2	1xTP-1 [C9]	182	0.00187545	0.000265778	6	High	High	High	High	Peak Found	High
[K].IHMGSCAENTAK.[K]	P24752	ACAT1	Acetyl-CoA acetyltransferase, mitochondrial	1xTP-1 [C6]	196	0.0136317	0.00139701	5	High	High	High	Peak Found	High	High
[K].IICNTKDNER.[V]	Q16881	TXNRD1	Thioredoxin reductase 1, cytoplasmic	1xTP-1 [C3]	577	0.0122027	0.00124196	6	High	High	High	High	High	High
[K].IIFVVGGPGSGKGTQCEK.[I]	P00568	AK1	Adenylate kinase isoenzyme 1	1xTP-1 [C16]	25	2.50776e-07	6.06648e-05	3	Not Found	Not Found	High	Not Found	High	High
[K].IINDNATYCR.[L]	O00567	NOP56	Nucleolar protein 56	1xTP-1 [C9]	211	0.145963	0.00986245	2	High	Peak Found	Peak Found	Peak Found	Peak Found	High
[K].IISNASCTTNCLAPLAK.[V]	P04406	GAPDH	Glyceraldehyde-3-ph	1xCarbamidomethyl [C]; 1xTP-1 [C]	145	5.40013e-06	6.06648e-05	8	Peak Found	High	High	High	High	High
[K].IKELNNTCEPVVTQPKPK.[I]	Q92598	HSPH1	Heat shock protein 105 kDa	1xTP-1 [C8]	796	0.00487509	0.000852955	2	Not Found	High	Not Found	Not Found	High	Not Found
[K].IKELTSTCSPIISKPKPK.[V]	P34932	HSPA4	Heat shock 70 kDa protein 4	1xTP-1 [C8]	779	5.46631e-06	6.06648e-05	6	High	High	High	High	High	High
[K].IKGCTGSLNMTLQR.[A]	Q96HC4	PDLIM5	PDZ and LIM domain protein 5	1xTP-1 [C4]	73	0.125028	0.00887505	1	Not Found	Not Found	Not Found	Not Found	High	Peak Found
[K].ILCFYGPPGVGK.[T]	P36776	LONP1	Lon protease homolog, mitochondrial	1xTP-1 [C3]	520	0.00328152	0.000637478	4	High	High	High	Peak Found	High	Peak Found
[K].ILDMCAAPGSK.[T]	Q08J23	NSUN2	RNA cytosine C(5)-methyltransferase NSUN2	1xTP-1 [C5]	184	0.0186215	0.00168587	3	Peak Found	Peak Found	High	High	Peak Found	High
[K].ILPFQYVLCAATSPAVK.[L]	Q12800	TFCP2	Alpha-globin transcription factor CP2	1xTP-1 [C9]	72	0.00968806	0.00109138	3	High	High	Peak Found	Peak Found	Peak Found	High
[K].ILTFDQLALDSPKGCGTVLLSGPR.[K]	Q07020	RPL18	60S ribosomal protein L18	1xTP-1 [C15]	134	1.54944e-06	6.06648e-05	3	High	Not Found	High	Not Found	Not Found	High
[K].IMKDLDQCRDGK.[V]	P60903	S100A10	Protein S100-A10	1xTP-1 [C8]	62	0.0767793	0.00627587	1	Not Found	Not Found	Peak Found	Not Found	Peak Found	High
[K].IPPCISNWK.[N]	Q13573	SNW1	SNW domain-containing protein 1	1xTP-1 [C4]	250	0.00711208	0.000949718	2	Peak Found	Peak Found	High	Peak Found	High	Peak Found
[K].IQPPRGCLFYGPPGTGK.[T]	Q6PL18	ATAD2	ATPase family AAA domain-containing protein 2	1xTP-1 [C7]	463	2.27257e-05	6.06648e-05	4	High	High	Peak Found	Peak Found	High	High
[K].ISGAIGPCVSLNSK.[G]	Q15436	SEC23A	Protein transport protein Sec23A	1xTP-1 [C8]	423	0.000302184	6.06648e-05	3	Not Found	Not Found	High	Not Found	High	High
[K].ISPLSSPCSSPLQGTPASSLVSK.[I]	Q14432	PDE3A	cGMP-inhibited 3',5'-cyclic ph	1xTP-1 [C8]	526	7.46042e-07	6.06648e-05	3	Not Found	High	High	Not Found	Not Found	High
[K].ITGCASPGK.[T]	P50991	CCT4	T-complex protein 1 subunit delta	1xTP-1 [C4]	379	0.00498871	0.000852955	2	Not Found	Peak Found	High	Peak Found	High	Peak Found
[K].ITHSPLTICFPEYTGANK.[Y]	P04899	GNAI2	Guanine nucleotide-binding protein G(i) subunit alpha-2	1xTP-1 [C9]	287	2.59825e-05	6.06648e-05	1	Not Found	Peak Found	High	Peak Found	Peak Found	Peak Found
[K].ITLTCGR.[D]	P48444	ARCN1	Coatomer subunit delta	1xTP-1 [C5]	286	0.110523	0.0082794	1	High	Peak Found	Peak Found	Peak Found	Peak Found	Peak Found
[K].IVFVPGCSIPLTIVK.[S]	P54136	RARS1	Arginine--tRNA ligase, cytoplasmic	1xTP-1 [C7]	369	0.000528938	6.06648e-05	5	Peak Found	High	High	High	High	High
[K].IVVNLTGRLNKCGVISPR.[F]	P62244	RPS15A	40S ribosomal protein S15a	1xTP-1 [C12]	72	0.0408818	0.00336646	1	Not Found	High	Not Found	Not Found	Not Found	Not Found
[K].KCHIAVGSPGR.[I]	Q9UHI6	DDX20	Probable ATP-dependent RNA helicase DDX20	1xTP-1 [C2]	181	0.012896	0.00128937	1	Peak Found	Not Found	Not Found	Not Found	Peak Found	High
[K].KCPFTGNVSIR.[G]	P62280	RPS11	40S ribosomal protein S11	1xTP-1 [C2]	60	0.0262321	0.00242546	3	Peak Found	High	Peak Found	Peak Found	High	High
[K].KDGVCGPPPSKK.[M]	Q08J23	NSUN2	RNA cytosine C(5)-methyltransferase NSUN2	1xTP-1 [C5]	502	0.00191955	0.000334782	4	High	High	Peak Found	High	High	Peak Found
[K].KDIHFMPCSGLTGANIK.[E]	P15170	GSPT1	Eukaryotic peptide chain release factor GTP-binding subunit ERF3A	1xTP-1 [C8]	261	8.07168e-06	6.06648e-05	5	High	High	High	Peak Found	High	High
[K].KDIHFMPCSGLTGANLK.[E]	P15170	GSPT1	Eukaryotic peptide chain release factor GTP-binding subunit ERF3A	1xOxidation [M6]; 1xTP-1 [C8]	261	0.00256309	0.000388332	2	High	Not Found	High	Peak Found	Peak Found	Peak Found
[K].KEPILVCPPLR.[S]	Q8N5N7	MRPL50	39S ribosomal protein L50, mitochondrial	1xTP-1 [C7]	52	0.000377757	6.06648e-05	6	High	High	High	High	High	High
[K].KFDPMGQQTCSAHPAR.[F]	Q9NPE3	NOP10	H/ACA ribonucleoprotein complex subunit 3	1xTP-1 [C10]	28	0.00216801	0.000388332	6	High	High	High	High	High	High
[K].KFQGIKHECQANGPEDLNR.[A]	P60981	DSTN	Destrin	1xTP-1 [C9]	135	0.00429615	0.000753666	1	Not Found	Not Found	Not Found	Not Found	Not Found	High
[K].KGCTGVITLNRPK.[F]	Q6NVY1	HIBCH	3-hydroxyisobutyryl-CoA hydrolase, mitochondrial	1xTP-1 [C3]	45	0.00221875	0.000388332	4	High	High	Peak Found	Peak Found	High	High
[K].KHPFPCPTSYR.[T]	P16435	POR	NADPH--cytochrome P450 reductase	1xTP-1 [C6]	363	0.0584197	0.004759	1	Not Found	Peak Found	Not Found	Peak Found	Not Found	High
[K].KINPICNDHYR.[S]	Q96KB5	PBK	Lymphokine-activated killer T-cell-originated protein kinase	1xTP-1 [C6]	70	0.000798628	0.000126086	8	High	High	High	High	High	High
[K].KLEEVVQILGDKFPCTLVAQK.[I]	Q9BY32	ITPA	Inosine triphosphate pyrophosphatase	1xTP-1 [C15]	33	0.0125828	0.00128937	2	High	High	Not Found	Not Found	Not Found	Not Found
[K].KLENCNYAVELGKHPAK.[F]	P13797	PLS3	Plastin-3	1xTP-1 [C5]	463	7.37248e-08	6.06648e-05	7	High	High	High	High	High	High
[K].KLGNNCVFAPADVTSEK.[D]	Q99714	HSD17B10	3-hydroxyacyl-CoA dehydrogenase type-2	1xTP-1 [C6]	58	4.7752e-05	6.06648e-05	2	Not Found	High	Peak Found	Not Found	Not Found	High
[K].KLTGIKHELQANCYEEVK.[D]	P23528	CFL1	Cofilin-1	1xTP-1 [C13]	139	0.058801	0.004759	1	Peak Found	Peak Found	Peak Found	High	Peak Found	Peak Found
[K].KNCPHIVVGTPGR.[I]	Q13838	DDX39B	Spliceosome RNA helicase DDX39B	1xTP-1 [C3]	165	2.52221e-06	6.06648e-05	12	High	High	High	High	High	High
[K].KNCPHVVVGTPGR.[I]	O00148	DDX39A	ATP-dependent RNA helicase DDX39A	1xTP-1 [C3]	164	8.89774e-06	6.06648e-05	11	High	High	High	High	High	High
[K].KNYCNIQVTK.[V]	P48444	ARCN1	Coatomer subunit delta	1xTP-1 [C4]	479	0.0168417	0.00158855	1	High	Not Found	Not Found	Not Found	Not Found	Not Found
[K].KPLTSNCTIQIATPGK.[G]	Q15061	WDR43	WD repeat-containing protein 43	1xTP-1 [C7]	315	2.43331e-08	6.06648e-05	6	High	High	High	High	High	High
[K].KPTRECESLSELK.[E]	Q96RR4	CAMKK2	Calcium/calmodulin-dependent protein kinase kinase 2	1xTP-1 [C6]	525	0.0835547	0.00676266	1	High	Not Found	Peak Found	Not Found	Peak Found	Not Found
[K].KQIPAITCIQSQWR.[G]	P46940	IQGAP1	Ras GTPase-activating-like protein IQGAP1	1xTP-1 [C8]	781	0.0619429	0.00503723	1	Peak Found	Peak Found	Peak Found	High	Peak Found	Peak Found
[K].KQTLCLQAQR.[E]	Q641Q2	WASHC2A	WASH complex subunit 2A	1xTP-1 [C5]	594	0.124221	0.00878803	2	Not Found	Peak Found	Not Found	Peak Found	High	High
[K].KSCHTGLGR.[S]	P02787	TF	Serotransferrin	1xTP-1 [C3]	137	0.00455002	0.000852955	4	High	High	Peak Found	Peak Found	High	High
[K].KSCPNPGEIR.[N]	P08174	CD55	Complement decay-accelerating factor	1xTP-1 [C3]	163	0.0140597	0.00144184	7	High	High	Peak Found	High	High	High
[K].KSVKVIVVGNPANTNCLTASK.[S]	P40925	MDH1	Malate dehydrogenase, cytoplasmic	1xTP-1 [C16]	137	0.00224455	0.000388332	3	Not Found	High	Not Found	Not Found	High	High
[K].KTCDALQAK.[V]	Q13423	NNT	NAD(P) transhydrogenase, mitochondrial	1xTP-1 [C3]	1073	0.044473	0.00379895	3	High	High	Peak Found	Peak Found	Peak Found	High
[K].KVCQGTSNK.[L]	P00533	EGFR	Epidermal growth factor receptor	1xTP-1 [C3]	31	0.0474524	0.00408505	5	High	Peak Found	Peak Found	High	Peak Found	High
[K].LAAQSCALSLVR.[Q]	Q08211	DHX9	ATP-dependent RNA helicase A	1xTP-1 [C6]	242	7.58128e-05	6.06648e-05	1	Not Found	Not Found	Not Found	Not Found	Not Found	High
[K].LCKEVPNYK.[L]	P62851	RPS25	40S ribosomal protein S25	1xTP-1 [C2]	59	0.0262321	0.00242546	2	High	High	Peak Found	Peak Found	Peak Found	Peak Found
[K].LCNIFSTK.[F]	P11388	TOP2A	DNA topoisomerase 2-alpha	1xTP-1 [C2]	191	0.00389715	0.000698603	5	Not Found	High	High	High	High	High
[K].LGEWVGLCKIDR.[E]	P25398	RPS12	40S ribosomal protein S12	1xTP-1 [C8]	92	0.000261384	6.06648e-05	1	Peak Found	Peak Found	Peak Found	Peak Found	Peak Found	High
[K].LGYAGNTEPQFIIPSCIAIK.[E]	P61158	ACTR3	Actin-related protein 3	1xTP-1 [C16]	34	1.60765e-07	6.06648e-05	6	High	High	High	High	High	High
[K].LHCTPGDGQR.[F]	Q6L8Q7	PDE12	2',5'-phosphodiesterase 12	1xTP-1 [C3]	250	0.0580408	0.00466654	1	Peak Found	Peak Found	High	Peak Found	Peak Found	Not Found
[K].LHIVQVVCKK.[Y]	O00299	CLIC1	Chloride intracellular channel protein 1	1xTP-1 [C8]	191	0.113434	0.00844532	1	High	Not Found	Not Found	Not Found	Not Found	Not Found
[K].LHVGNISPTCTNK.[E]	Q9BWF3	RBM4	RNA-binding protein 4	1xTP-1 [C10]	89	3.27442e-05	6.06648e-05	6	High	High	High	High	High	High
[K].LIIVEGCQR.[QL]	P05023	ATP1A1	Sodium/potassium-transporting ATPase subunit alpha-1	1xTP-1 [C7]	705	0.00101856	0.000126086	2	Peak Found	Peak Found	Not Found	Peak Found	High	High
[K].LLACIASRPGQCGR.[A]	P62241	RPS8	40S ribosomal protein S8	1xCarbamidomethyl [C4]; 1xTP-1 [C12]	182	0.000227426	6.06648e-05	3	High	Peak Found	High	High	Not Found	Not Found
[K].LLCGLLAER.[L]	P14174	MIF	Macrophage migration inhibitory factor	1xTP-1 [C3]	81	0.0803564	0.00659109	3	Peak Found	Peak Found	Peak Found	High	High	High
[K].LLKITGCASPGK.[T]	P50991	CCT4	T-complex protein 1 subunit delta	1xTP-1 [C7]	379	0.0788034	0.00640868	2	Peak Found	High	Peak Found	Not Found	High	Peak Found
[K].LLPLNDCR.[Y]	Q9Y281	CFL2	Cofilin-2	1xTP-1 [C7]	80	0.0279644	0.00257567	2	Peak Found	High	Peak Found	Peak Found	High	Peak Found
[K].LNISFPATGCQK.[L]	P62753	RPS6	40S ribosomal protein S6	1xTP-1 [C10]	12	0.00123767	0.000126086	6	High	High	High	High	High	High
[K].LPTAPFGCAPGTSFLQVTPPTSQNTTAR.[N]	Q8ND82	ZNF280C	Zinc finger protein 280C	1xTP-1 [C8]	530	0.0301997	0.00282039	2	Not Found	Not Found	High	Not Found	High	Not Found
[K].LQKPNAAIRDCDR.[A]	P50502	ST13	Hsc70-interacting protein	1xTP-1 [C11]	171	0.0419542	0.00346179	1	Peak Found	High	Peak Found	Peak Found	Peak Found	Peak Found
[K].LQLCHMLVEPNLCR.[S]	Q9BXL8	CDCA4	Cell division cycle-associated protein 4	1xOxidation [M6]; 1xTP-1 [C13]	57	0.0085946	0.00109138	30	High	High	High	High	High	High
[K].LQLIPGVCGFR.[I]	Q16719	KYNU	Kynureninase	1xTP-1 [C8]	327	0.00968806	0.00109138	4	High	Peak Found	High	High	High	Peak Found
[K].LSCPALGISK.[R]	O43463	SUV39H1	Histone-lysine N-methyltransferase SUV39H1	1xTP-1 [C3]	30	0.00553517	0.000852955	2	Not Found	Not Found	Not Found	Peak Found	High	High
[K].LSTACPGR.[V]	P55060	CSE1L	Exportin-2	1xTP-1 [C5]	939	0.0752953	0.00618591	4	High	Peak Found	High	Peak Found	High	High
[K].LTDCVVMRDPASK.[R]	P22626	HNRNPA2B1	Heterogeneous nuclear ribonucleoproteins A2/B1	1xTP-1 [C4]	50	0.054741	0.00433597	4	High	Not Found	High	High	High	Peak Found
[K].LTFSCLGGSDNFK.[H]	Q15185	PTGES3	Prostaglandin E synthase 3	1xTP-1 [C5]	40	0.00151127	0.000126086	5	Not Found	High	High	High	High	High
[K].LTGIKHELQANCYEEVKDR.[C]	P23528	CFL1	Cofilin-1	1xTP-1 [C12]	139	2.82938e-05	6.06648e-05	2	High	High	Peak Found	Peak Found	Peak Found	Peak Found
[K].LTGMAFRVPTANVSVVDLTCR.[L]	P04406	GAPDH	Glyceraldehyde-3-ph	1xTP-1 [C20]	247	2.975e-08	6.06648e-05	1	Not Found	Not Found	High	Not Found	Not Found	Not Found
[K].LTGMAFRVPTANVSVVDLTCRLEKPAK.[Y]	P04406	GAPDH	Glyceraldehyde-3-ph	1xTP-1 [C20]	247	0.00241952	0.000388332	1	Not Found	Not Found	Not Found	Not Found	High	Not Found
[K].LTTLPSDFCGLTHLVK.[L]	Q96AG4	LRRC59	Leucine-rich repeat-containing protein 59	1xTP-1 [C9]	59	0.0032441	0.000637478	1	Not Found	High	Not Found	Not Found	Not Found	Not Found
[K].LTTPTYGDLNHLVSATMSGVTTCLR.[F]	Q13885	TUBB2A	Tubulin beta-2A chain	1xTP-1 [C23]	239	1.80428e-06	6.06648e-05	3	Not Found	High	Peak Found	High	Not Found	High
[K].LVILANNCPALR.[K]	P62888	RPL30	60S ribosomal protein L30	1xTP-1 [C8]	52	9.49325e-05	6.06648e-05	5	High	High	High	High	High	Peak Found
[K].LVILANNCPALRK.[S]	P62888	RPL30	60S ribosomal protein L30	1xTP-1 [C8]	52	3.14164e-07	6.06648e-05	5	High	High	High	Not Found	High	High
[K].LYCQVAGTNYFYLLK.[D]	P59510	ADAMTS20	A disintegrin and metalloproteinase with thromb	1xTP-1 [C3]	658	0.112699	0.00841557	3	Peak Found	High	Peak Found	Peak Found	Peak Found	High
[K].MIPCDFLIPVQTQHPIRK.[G]	P06744	GPI	Glucose-6-phosphate isomerase	1xTP-1 [C4]	404	2.90146e-06	6.06648e-05	3	Peak Found	High	High	High	Not Found	Peak Found
[K].MLPDKDCR.[Y]	P23528	CFL1	Cofilin-1	1xTP-1 [C7]	80	0.0393255	0.00331644	2	High	Peak Found	Peak Found	Not Found	High	Peak Found
[K].MLSCAGADR.[L]	P27635	RPL10	60S ribosomal protein L10	1xOxidation [M1]; 1xTP-1 [C4]	105	0.0835547	0.00676266	5	High	High	High	High	High	Not Found
[K].MVSISNYPLSAALTCAK.[L]	Q92979	EMG1	Ribosomal RNA small subunit methyltransferase NEP1	1xTP-1 [C15]	230	2.81221e-05	6.06648e-05	3	Peak Found	High	Peak Found	Not Found	High	High
[K].MVSISNYPLSAALTCAK.[L]	Q92979	EMG1	Ribosomal RNA small subunit methyltransferase NEP1	1xOxidation [M1]; 1xTP-1 [C15]	230	0.000528938	6.06648e-05	5	High	High	Peak Found	Not Found	High	High
[K].NAGNCLSPAVIVGLLK.[E]	O43175	PHGDH	D-3-phosphoglycerate dehydrogenase	1xTP-1 [C5]	369	5.50183e-07	6.06648e-05	6	High	High	High	High	High	High
[K].NCLTNFHGMDLTR.[D]	P61247	RPS3A	40S ribosomal protein S3a	1xTP-1 [C2]	96	0.00636342	0.000904544	2	High	High	Peak Found	Peak Found	Peak Found	Peak Found
[K].NGFVVLKGRPCKIVEMSTSK.[T]	P63241	EIF5A	Eukaryotic translation initiation factor 5A-1	1xTP-1 [C11]	38	0.0145021	0.00144184	2	High	Not Found	High	Not Found	Not Found	Not Found
[K].NICQQVNIK.[S]	Q14152	EIF3A	Eukaryotic translation initiation factor 3 subunit A	1xTP-1 [C3]	78	0.044473	0.00379895	4	High	High	High	High	Peak Found	Peak Found
[K].NILDSKPTANKKCDLISIPK.[K]	Q9ULV4	CORO1C	Coronin-1C	1xTP-1 [C13]	420	0.00101856	0.000126086	2	High	High	Not Found	Not Found	Not Found	Not Found
[K].NLCPVGSSKPTK.[T]	A3KN83	SBNO1	Protein strawberry notch homolog 1	1xTP-1 [C3]	445	0.0021307	0.000388332	1	High	Peak Found	Peak Found	Peak Found	Peak Found	Peak Found
[K].NMSVHLSPCFR.[D]	P62280	RPS11	40S ribosomal protein S11	1xTP-1 [C9]	116	0.00628963	0.000904544	2	High	Not Found	Not Found	Not Found	High	Not Found
[K].NNTQVLINCR.[N]	P62316	SNRPD2	Small nuclear ribonucleoprotein Sm D2	1xTP-1 [C9]	46	1.43947e-05	6.06648e-05	6	High	High	High	High	High	High
[K].NQALFPACVLK.[N]	Q92499	DDX1	ATP-dependent RNA helicase DDX1	1xTP-1 [C8]	231	3.25455e-05	6.06648e-05	4	High	High	High	High	Peak Found	Peak Found
[K].NRVIGSGCNLDSAR.[F]	P00338	LDHA	L-lactate dehydrogenase A chain	1xTP-1 [C8]	163	0.0584197	0.004759	2	Peak Found	Peak Found	High	Peak Found	Peak Found	High
[K].NSAKDCYPAVQK.[T]	Q14974	KPNB1	Importin subunit beta-1	1xTP-1 [C6]	543	0.0474524	0.00408505	4	High	High	High	Peak Found	High	Peak Found
[K].NTPSFLIACNK.[Q]	Q9Y5M8	SRPRB	Signal recognition particle receptor subunit beta	1xTP-1 [C9]	179	0.00363817	0.000637478	3	Peak Found	High	Peak Found	Not Found	High	High
[K].NVLCGNIPPDLFAR.[M]	P23193	TCEA1	Transcription elongation factor A protein 1	1xTP-1 [C4]	212	0.000528938	6.06648e-05	2	High	Not Found	High	Not Found	Not Found	Not Found
[K].QACVLMIK.[A]	P35579	MYH9	Myosin-9	1xOxidation [M6]; 1xTP-1 [C3]	740	0.0798354	0.00654825	1	Not Found	Not Found	Not Found	Not Found	High	Peak Found
[K].QCVPFR.[R]	P18621	RPL17	60S ribosomal protein L17	1xTP-1 [C2]	57	0.101564	0.00766655	2	Peak Found	Peak Found	Peak Found	High	Peak Found	High
[K].QFTPCQLLADHANSPNKK.[F]	P40939	HADHA	Trifunctional enzyme subunit alpha, mitochondrial	1xTP-1 [C5]	747	3.28055e-09	6.06648e-05	5	High	High	High	Peak Found	High	High
[K].QGFGNLPICMAK.[T]	P11586	MTHFD1	C-1-tetrahydrofolate synthase, cytoplasmic	1xTP-1 [C9]	863	0.131669	0.00936106	2	Not Found	Peak Found	Peak Found	Peak Found	High	High
[K].QIPAITCIQSQWR.[G]	P46940	IQGAP1	Ras GTPase-activating-like protein IQGAP1	1xTP-1 [C7]	781	0.000413467	6.06648e-05	3	Peak Found	Peak Found	High	Peak Found	High	High
[K].QISSNKCFGGLQK.[V]	P10768	ESD	S-formylglutathione hydrolase	1xTP-1 [C7]	11	0.061142	0.00499043	1	Not Found	High	Not Found	Not Found	Not Found	Not Found
[K].QKPCDLPLR.[L]	O00425	IGF2BP3	Insulin-like growth factor 2 mRNA-binding protein 3	1xTP-1 [C4]	194	0.0471455	0.00408505	1	Peak Found	Peak Found	Not Found	Not Found	Peak Found	High
[K].QLLCGAAVGTR.[E]	P20839	IMPDH1	Inosine-5'-monophosphate dehydrogenase 1	1xTP-1 [C4]	246	0.0298147	0.00282039	2	High	Peak Found	Peak Found	Peak Found	High	Peak Found
[K].QLRPACAQALTR.[I]	Q8IXI1	RHOT2	Mitochondrial Rho GTPase 2	1xTP-1 [C6]	185	0.00380883	0.000698603	2	Peak Found	Not Found	High	Peak Found	Not Found	High
[K].QLSSCLPNIVPK.[L]	Q92616	GCN1	eIF-2-alpha kinase activator GCN1	1xTP-1 [C5]	1535	0.0179318	0.00168587	2	Not Found	Not Found	Not Found	Not Found	High	High
[K].QPLQKPSHCTIYVAK.[N]	Q9P2J5	LARS1	Leucine--tRNA ligase, cytoplasmic	1xTP-1 [C9]	936	0.0124292	0.00128937	2	High	Peak Found	High	Peak Found	Peak Found	Peak Found
[K].QRPGQQVATCVR.[L]	O75534	CSDE1	Cold shock domain-containing protein E1	1xTP-1 [C10]	506	1.71847e-06	6.06648e-05	7	High	High	Peak Found	High	High	High
[K].RALANSLACQGK.[Y]	P04075	ALDOA	Fructose-bisphosphate aldolase A	1xTP-1 [C9]	339	1.24375e-05	6.06648e-05	5	High	High	High	High	High	Peak Found
[K].RELHGQNPVVTPCNK.[Q]	Q16630	CPSF6	Cleavage and polyadenylation specificity factor subunit 6	1xTP-1 [C13]	159	0.000406068	6.06648e-05	1	High	Peak Found	Peak Found	Peak Found	Peak Found	Peak Found
[K].RGLDVNKCEIAR.[F]	Q9ULV4	CORO1C	Coronin-1C	1xTP-1 [C8]	330	0.0644093	0.00526731	3	High	Not Found	High	Not Found	Not Found	High
[K].RKELEQVCNPIISGLYQGAGGPGPGGFGAQGPK.[G]	P0DMV9	HSPA1B	Heat shock 70 kDa protein 1B	1xTP-1 [C8]	603	5.12731e-20	6.06648e-05	5	High	High	High	High	Not Found	High
[K].RLCAAAASILGKPADR.[V]	P30046	DDT	D-dopachrome decarboxylase	1xTP-1 [C3]	24	3.67936e-06	6.06648e-05	4	Not Found	High	High	Not Found	High	High
[K].RPNKPLFTALVTQCQK.[M]	Q8NCW5	NAXE	NAD(P)H-hydrate epimerase	1xTP-1 [C14]	158	2.04912e-05	6.06648e-05	2	High	High	Peak Found	Not Found	Peak Found	Peak Found
[K].RPTEICADPQFIIGGATR.[T]	P17655	CAPN2	Calpain-2 catalytic subunit	1xTP-1 [C6]	82	9.46676e-09	6.06648e-05	2	Peak Found	Not Found	Not Found	High	High	Peak Found
[K].RPVFPPLCGDGLLSGK.[E]	Q9NRX1	PNO1	RNA-binding protein PNO1	1xTP-1 [C8]	64	0.00119468	0.000126086	1	Not Found	High	Not Found	Peak Found	Peak Found	Peak Found
[K].RSIQFVDWCPTGFK.[V]	P68366	TUBA4A	Tubulin alpha-4A chain	1xTP-1 [C9]	347	0.0011396	0.000126086	1	Peak Found	Peak Found	Not Found	Peak Found	High	Peak Found
[K].RVCEEIAIIPSKK.[L]	P08708	RPS17	40S ribosomal protein S17	1xTP-1 [C3]	35	1.25135e-05	6.06648e-05	3	Peak Found	Not Found	High	High	High	Not Found
[K].SAFLCGVMK.[T]	O43390	HNRNPR	Heterogeneous nuclear ribonucleoprotein R	1xTP-1 [C5]	96	0.0499814	0.0042136	2	Peak Found	Peak Found	High	Peak Found	High	Peak Found
[K].SANICIGRPVLLTSLNGK.[Q]	Q8NB90	SPATA5	ATPase family protein 2 homolog	1xTP-1 [C5]	81	4.15596e-06	6.06648e-05	2	Not Found	Peak Found	High	Peak Found	High	Not Found
[K].SCDPKGPLMMYISK.[M]	P13639	EEF2	Elongation factor 2	2xOxidation [M9; M10]; 1xTP-1 [C2]	388	1.72897e-06	6.06648e-05	6	High	High	High	High	High	High
[K].SCDPKGPLMMYISK.[M]	P13639	EEF2	Elongation factor 2	1xTP-1 [C2]	388	0.006947	0.000949718	3	High	High	High	Peak Found	Peak Found	Peak Found
[K].SCDPKGPLMMYISK.[M]	P13639	EEF2	Elongation factor 2	1xOxidation [M9]; 1xTP-1 [C2]	388	0.000178483	6.06648e-05	5	High	High	Peak Found	High	High	High
[K].SCQFVAVR.[R]	P07814	EPRS1	Bifunctional glutamate/proline--tRNA ligase	1xTP-1 [C2]	1377	0.0339024	0.00314487	2	Peak Found	High	Peak Found	High	Peak Found	Peak Found
[K].SFTASCPVSAFVPK.[E]	Q6P587	FAHD1	Acylpyruvase FAHD1, mitochondrial	1xTP-1 [C6]	129	0.0373444	0.00331644	3	Peak Found	Peak Found	Peak Found	Not Found	High	High
[K].SFVLNLGKDSNNLCLHFNPR.[F]	P09382	LGALS1	Galectin-1	1xTP-1 [C14]	43	1.14909e-05	6.06648e-05	4	High	High	High	High	Peak Found	Peak Found
[K].SGDAAIVDMVPGKPMCVESFSDYPPLGR.[F]	P68104	EEF1A1	Elongation factor 1-alpha 1	1xTP-1 [C16]	411	9.87598e-08	6.06648e-05	2	Not Found	High	High	Not Found	Not Found	Not Found
[K].SGYFPSSSVKPCPVDGRPPISRPPSR.[E]	P52735	VAV2	Guanine nucleotide exchange factor VAV2	1xTP-1 [C12]	650	1.39704e-06	6.06648e-05	6	High	High	High	High	High	High
[K].SHRVPLDVACAR.[G]	Q15149	PLEC	Plectin	1xTP-1 [C10]	3295	0.000793892	0.000126086	2	High	Peak Found	High	Peak Found	Peak Found	Peak Found
[K].SIKDTICNQDER.[I]	Q9ULV4	CORO1C	Coronin-1C	1xTP-1 [C7]	456	0.0322023	0.00306576	3	Not Found	High	High	Not Found	Not Found	High
[K].SIQCLTVHK.[N]	O75083	WDR1	WD repeat-containing protein 1	1xTP-1 [C4]	325	0.100251	0.00762613	3	High	High	Not Found	Not Found	High	Not Found
[K].SKGCGVVKFESPEVAER.[A]	P52272	HNRNPM	Heterogeneous nuclear ribonucleoprotein M	1xTP-1 [C4]	694	1.38058e-07	6.06648e-05	5	High	High	High	High	Peak Found	High
[K].SKLTFSCLGGSDNFK.[H]	Q15185	PTGES3	Prostaglandin E synthase 3	1xTP-1 [C7]	40	1.11463e-05	6.06648e-05	4	High	Not Found	High	High	Not Found	High
[K].SLCREEAETPAEATGKPQR.[D]	Q8N9T8	KRI1	Protein KRI1 homolog	1xTP-1 [C3]	591	0.00106162	0.000126086	2	Peak Found	Peak Found	Not Found	Peak Found	High	High
[K].SMSVYCTPNKPSR.[T]	P16615	ATP2A2	Sarcoplasmic/endoplasmic reticulum calcium ATPase 2	1xTP-1 [C6]	498	0.0121281	0.00124196	4	High	Not Found	High	Not Found	High	High
[K].SMSVYCTPNKPSR.[T]	P16615	ATP2A2	Sarcoplasmic/endoplasmic reticulum calcium ATPase 2	1xOxidation [M2]; 1xTP-1 [C6]	498	0.000127843	6.06648e-05	6	High	High	High	High	High	High
[K].SNIHCNTIAPNAGSR.[M]	P51659	HSD17B4	Peroxisomal multifunctional enzyme type 2	1xTP-1 [C5]	189	0.000107852	6.06648e-05	3	Peak Found	High	Peak Found	Not Found	High	High
[K].SPPRPCGLNHSDSLSR.[S]	Q9H8M5	CNNM2	Metal transporter CNNM2	1xTP-1 [C6]	754	0.0021307	0.000388332	1	Not Found	Not Found	Not Found	Not Found	High	Peak Found
[K].SRDLLVQQASQCLSK.[L]	Q1KMD3	HNRNPUL2	Heterogeneous nuclear ribonucleoprotein U-like protein 2	1xTP-1 [C12]	518	0.0178195	0.00168587	1	Peak Found	Peak Found	Not Found	Not Found	High	Peak Found
[K].SSFLVDCSK.[A]	O75369	FLNB	Filamin-B	1xTP-1 [C7]	2537	0.00628963	0.000904544	3	Peak Found	High	Peak Found	Peak Found	High	High
[K].STLTDSLVCK.[A]	P13639	EEF2	Elongation factor 2	1xTP-1 [C9]	41	0.000480521	6.06648e-05	1	Not Found	Not Found	Not Found	Not Found	Not Found	High
[K].SVAWAPSGNLLATCSR.[D]	O76071	CIAO1	Probable cyt	1xTP-1 [C14]	123	9.6896e-06	6.06648e-05	3	Not Found	Not Found	High	Not Found	High	High
[K].SVLCSTPTINIPASPFMQK.[L]	Q96KB5	PBK	Lymphokine-activated killer T-cell-originated protein kinase	1xTP-1 [C4]	22	4.03132e-06	6.06648e-05	2	High	Peak Found	Peak Found	Not Found	High	Not Found
[K].TACAINK.[V]	Q52LJ0	FAM98B	Protein FAM98B	1xTP-1 [C3]	292	0.138644	0.00961207	1	Peak Found	High	Not Found	Peak Found	Peak Found	Peak Found
[K].TATAVAHCK.[R]	P62249	RPS16	40S ribosomal protein S16	1xTP-1 [C8]	25	0.00928916	0.00109138	4	High	Peak Found	High	High	Peak Found	High
[K].TATAVAHCKR.[G]	P62249	RPS16	40S ribosomal protein S16	1xTP-1 [C8]	25	4.54833e-05	6.06648e-05	12	High	High	High	High	High	High
[K].TDIQIALPSGCYGR.[V]	P33316	DUT	Deoxyuridine 5'-triph	1xTP-1 [C11]	166	0.000171066	6.06648e-05	2	Peak Found	Peak Found	Peak Found	High	Peak Found	High
[K].TDKQPLQKPSHCTIYVAK.[N]	Q9P2J5	LARS1	Leucine--tRNA ligase, cytoplasmic	1xTP-1 [C12]	936	0.0477613	0.00412458	3	Peak Found	High	High	Peak Found	High	Peak Found
[K].TGCNVLLIQK.[S]	P50991	CCT4	T-complex protein 1 subunit delta	1xTP-1 [C3]	295	0.00215551	0.000388332	7	High	High	High	High	High	High
[K].TGQATVASGIPAGWMGLDCGPESSK.[K]	P00558	PGK1	Phosphoglycerate kinase 1	1xTP-1 [C19]	316	0.000498144	6.06648e-05	2	High	Not Found	Not Found	Not Found	High	Not Found
[K].TGQATVASGIPAGWMGLDCGPESSKK.[Y]	P00558	PGK1	Phosphoglycerate kinase 1	1xTP-1 [C19]	316	2.05504e-13	6.06648e-05	6	High	High	High	High	High	High
[K].TGQATVASGIPAGWMGLDCGPESSKK.[Y]	P00558	PGK1	Phosphoglycerate kinase 1	1xOxidation [M15]; 1xTP-1 [C19]	316	2.81721e-09	6.06648e-05	5	High	High	High	High	High	Peak Found
[K].TGVHHYSGNNIELGTACGK.[Y]	P62888	RPL30	60S ribosomal protein L30	1xTP-1 [C17]	85	0.00625308	0.000904544	5	Peak Found	High	High	High	High	High
[K].TIADIIRTCLGPK.[S]	P49368	CCT3	T-complex protein 1 subunit gamma	1xTP-1 [C9]	40	0.00481929	0.000852955	2	Peak Found	Peak Found	High	Peak Found	Peak Found	High
[K].TIAECLADELINAAK.[G]	P46782	RPS5	40S ribosomal protein S5	1xTP-1 [C5]	172	2.13834e-05	6.06648e-05	2	Not Found	Not Found	High	High	Not Found	Not Found
[K].TIIPLISQCTPK.[V]	P40926	MDH2	Malate dehydrogenase, mitochondrial	1xTP-1 [C9]	212	5.2634e-05	6.06648e-05	6	High	High	High	High	High	High
[K].TLAYCIPVVQSLQAMESK.[I]	Q9H8H2	DDX31	Probable ATP-dependent RNA helicase DDX31	1xTP-1 [C5]	286	0.0222286	0.00203653	1	Peak Found	Not Found	Peak Found	High	Not Found	Peak Found
[K].TNGILFCGR.[F]	P35237	SERPINB6	Serpin B6	1xTP-1 [C7]	370	0.00294252	0.00051845	5	High	High	High	Peak Found	High	High
[K].TNHIGHTGYLNTVTVSPDGSLCASGGK.[D]	P63244	RACK1	Receptor of activated protein C kinase 1	1xTP-1 [C22]	207	8.913e-11	6.06648e-05	3	Not Found	High	Not Found	Not Found	High	High
[K].TPLRPLDPTRLQGINCGPDFTPSFANLGR.[T]	Q04637	EIF4G1	Eukaryotic translation initiation factor 4 gamma 1	1xTP-1 [C16]	662	0.000267783	6.06648e-05	2	Not Found	Not Found	Not Found	High	Not Found	High
[K].TQARPVGVKIPTCK.[I]	O95433	AHSA1	Activator of 90 kDa heat shock protein ATPase homolog 1	1xTP-1 [C13]	207	9.80833e-06	6.06648e-05	6	High	High	High	High	High	High
[K].TQLAVCQQR.[I]	Q02790	FKBP4	Peptidyl-prolyl cis-trans isomerase FKBP4	1xTP-1 [C6]	396	0.00917847	0.00109138	5	Not Found	High	High	High	High	High
[K].TVIGELPPASSGSALAANVCK.[K]	Q86VP6	CAND1	Cullin-associated NEDD8-dissociated protein 1	1xTP-1 [C20]	131	0.00225756	0.000388332	1	Not Found	Not Found	Not Found	Not Found	High	Not Found
[K].TVIGELPPASSGSALAANVCKK.[I]	Q86VP6	CAND1	Cullin-associated NEDD8-dissociated protein 1	1xTP-1 [C20]	131	1.24518e-08	6.06648e-05	3	Not Found	High	Not Found	Not Found	High	High
[K].TYGCVPVANKR.[D]	O75391	SPAG7	Sperm-associated antigen 7	1xTP-1 [C4]	191	0.0996005	0.00758237	2	Peak Found	Not Found	Peak Found	Not Found	High	High
[K].VAHSFNCTPIEGMLSHQLK.[Q]	Q9UQ80	PA2G4	Proliferation-associated protein 2G4	1xTP-1 [C7]	179	2.03998e-09	6.06648e-05	4	High	High	Peak Found	Not Found	High	High
[K].VAHSFNCTPIEGMLSHQLK.[Q]	Q9UQ80	PA2G4	Proliferation-associated protein 2G4	1xOxidation [M13]; 1xTP-1 [C7]	179	4.36509e-07	6.06648e-05	3	High	High	Not Found	Not Found	High	Not Found
[K].VAPLVQSLCAK.[H]	O60427	FADS1	Acyl-CoA (8-3)-desaturase	1xTP-1 [C9]	407	0.0157232	0.00154265	1	Peak Found	High	Peak Found	Peak Found	Peak Found	Peak Found
[K].VAQPVRGCGPPR.[R]	Q15654	TRIP6	Thyroid receptor-interacting protein 6	1xTP-1 [C8]	181	0.00596865	0.000904544	5	High	High	Peak Found	Peak Found	Peak Found	High
[K].VAVVAGYGDVGKGCAQALR.[G]	P23526	AHCY	Adenosylhomocysteinase	1xTP-1 [C14]	228	0.0301997	0.00282039	1	Not Found	Not Found	Not Found	Not Found	Peak Found	High
[K].VAVVAGYGDVGKGCAQALRGFGAR.[V]	P23526	AHCY	Adenosylhomocysteinase	1xTP-1 [C14]	228	0.000151523	6.06648e-05	1	Not Found	Not Found	Not Found	Not Found	High	Not Found
[K].VCNPIITK.[L]	P11142	HSPA8	Heat shock cognate 71 kDa protein	1xTP-1 [C2]	603	0.00460261	0.000852955	6	High	High	High	High	High	High
[K].VHSVAWSCDGRR.[L]	Q96J01	THOC3	THO complex subunit 3	1xTP-1 [C8]	65	0.0439003	0.00370049	2	Peak Found	Peak Found	Peak Found	Peak Found	High	High
[K].VHVCGQTHR.[T]	Q9NZM1	MYOF	Myoferlin	1xTP-1 [C4]	225	0.00447229	0.000852955	9	High	High	High	High	High	High
[K].VIQCFAETGQVQK.[I]	Q00610	CLTC	Clathrin heavy chain 1	1xTP-1 [C4]	491	6.83677e-05	6.06648e-05	4	High	Not Found	High	High	Peak Found	High
[K].VIVVGNPANTNCLTASK.[S]	P40925	MDH1	Malate dehydrogenase, cytoplasmic	1xTP-1 [C12]	137	5.98918e-06	6.06648e-05	7	High	High	High	High	High	High
[K].VKCSGPGLER.[A]	P21333	FLNA	Filamin-A	1xTP-1 [C3]	1165	0.0841	0.00685547	3	Not Found	Peak Found	High	Peak Found	High	High
[K].VKCSGPGLSPGMVR.[A]	P21333	FLNA	Filamin-A	1xOxidation [M12]; 1xTP-1 [C3]	1453	0.00164022	0.000195391	2	Peak Found	Not Found	Not Found	Not Found	High	High
[K].VLLCGPVGPK.[L]	Q9BRR6	ADPGK	ADP-dependent glucokinase	1xTP-1 [C4]	178	0.00540855	0.000852955	4	High	High	Not Found	Not Found	High	High
[K].VLSVCPSNKPAIVEAGGMQALGK.[H]	P14923	JUP	Junction plakoglobin	1xTP-1 [C5]	341	5.08945e-11	6.06648e-05	3	High	Not Found	Not Found	Not Found	High	High
[K].VLVTTNVCAR.[G]	Q9NUU7	DDX19A	ATP-dependent RNA helicase DDX19A	1xTP-1 [C8]	392	6.92043e-05	6.06648e-05	5	High	High	High	High	Not Found	High
[K].VMPFSTACNTPLSNFESHQNYK.[D]	P41252	IARS1	Isoleucine--tRNA ligase, cytoplasmic	1xTP-1 [C8]	185	1.56995e-09	6.06648e-05	5	High	High	High	Not Found	High	High
[K].VMPFSTACNTPLSNFESHQNYK.[D]	P41252	IARS1	Isoleucine--tRNA ligase, cytoplasmic	1xOxidation [M2]; 1xTP-1 [C8]	185	0.000857667	0.000126086	1	Not Found	Not Found	Not Found	High	Not Found	Not Found
[K].VMSQNFTNCHTK.[I]	Q13283	G3BP1	Ras GTPase-activating protein-binding protein 1	1xTP-1 [C9]	73	0.00917847	0.00109138	1	Peak Found	Peak Found	Peak Found	Peak Found	High	Peak Found
[K].VMSQNFTNCHTK.[I]	Q13283	G3BP1	Ras GTPase-activating protein-binding protein 1	1xOxidation [M2]; 1xTP-1 [C9]	73	0.0021307	0.000388332	5	High	High	High	High	Peak Found	High
[K].VNPLGGAVALGHPLGCTGAR.[Q]	P09110	ACAA1	3-ketoacyl-CoA thiolase, peroxisomal	1xTP-1 [C16]	381	0.0772804	0.00631784	1	Peak Found	Peak Found	Peak Found	Not Found	High	Peak Found
[K].VPADTEVVCAPPTAYIDFAR.[Q]	P60174	TPI1	Triosephosphate isomerase	1xTP-1 [C9]	42	3.29733e-06	6.06648e-05	5	High	High	High	High	Not Found	High
[K].VRGLPWSCSADEVQR.[F]	P31943	HNRNPH1	Heterogeneous nuclear ribonucleoprotein H	1xTP-1 [C8]	22	0.00504654	0.000852955	1	Not Found	Not Found	Not Found	Not Found	Not Found	High
[K].VSPCLPVLSR.[L]	O60684	KPNA6	Importin subunit alpha-7	1xTP-1 [C4]	253	0.033685	0.00310692	1	Not Found	High	Not Found	Not Found	Not Found	Not Found
[K].VSRPLELCYAPTK.[D]	Q06587	RING1	E3 ubiquitin-protein ligase RING1	1xTP-1 [C8]	398	0.046237	0.00394283	1	Not Found	Not Found	Not Found	Peak Found	High	Not Found
[K].VTFQPPSSIGCR.[K]	A0MZ66	SHTN1	Shootin-1	1xTP-1 [C11]	565	0.0117628	0.00119102	4	High	Peak Found	High	High	High	Not Found
[K].VTFQPPSSIGCRK.[K]	A0MZ66	SHTN1	Shootin-1	1xTP-1 [C11]	565	9.60933e-05	6.06648e-05	3	Not Found	High	Not Found	Peak Found	High	High
[K].VTVAGLAGKDPVQCSR.[D]	Q99497	PARK7	Parkinson disease protein 7	1xTP-1 [C14]	46	3.79691e-09	6.06648e-05	3	High	Peak Found	Not Found	Peak Found	High	High
[K].VVAVDCGIKNNVIR.[L]	P31327	CPS1	Carbamoyl-ph	1xTP-1 [C6]	225	0.000571778	6.06648e-05	2	Peak Found	Peak Found	Peak Found	High	High	Peak Found
[K].VVPCLVTPVTGR.[E]	O75369	FLNB	Filamin-B	1xTP-1 [C4]	991	1.53918e-05	6.06648e-05	6	High	High	High	High	High	High
[K].WASGLTPAQNCPR.[A]	O15533	TAPBP	Tapasin	1xTP-1 [C11]	115	0.00256309	0.000388332	2	Peak Found	Peak Found	Not Found	Peak Found	High	High
[K].YAGGNPVCVRPTPK.[W]	Q15004	PCLAF	PCNA-associated factor	1xTP-1 [C8]	54	1.90476e-05	6.06648e-05	3	High	Peak Found	High	High	Peak Found	Peak Found
[K].YHNVGLSKCEIK.[V]	Q14103	HNRNPD	Heterogeneous nuclear ribonucleoprotein D0	1xTP-1 [C9]	252	0.143178	0.00977657	1	High	Peak Found	Peak Found	Peak Found	Peak Found	Peak Found
[K].YICENQDSISSK.[L]	P02768	ALB	Albumin	1xTP-1 [C3]	289	0.0366283	0.00318806	2	Not Found	Not Found	Not Found	Not Found	High	High
[K].YICQKPSIQK.[A]	Q7Z6Z7	HUWE1	E3 ubiquitin-protein ligase HUWE1	1xTP-1 [C3]	699	0.00829312	0.00109138	3	High	Not Found	High	Not Found	High	Not Found
[K].YIQAACK.[T]	Q00610	CLTC	Clathrin heavy chain 1	1xTP-1 [C6]	736	0.114173	0.00844532	4	High	High	Not Found	Not Found	High	High
[K].YLPALQGCR.[S]	Q9UQ88	CDK11A	Cyclin-dependent kinase 11A	1xTP-1 [C8]	420	0.044473	0.00379895	1	Peak Found	Peak Found	Not Found	Peak Found	High	Peak Found
[K].YNPNVLPVQCTGKR.[D]	P05026	ATP1B1	Sodium/potassium-transporting ATPase subunit beta-1	1xTP-1 [C10]	213	0.00169868	0.000195391	1	Peak Found	Peak Found	Peak Found	Peak Found	High	Peak Found
[K].YQIDPDACFSAK.[V]	P21796	VDAC1	Voltage-dependent anion-selective channel protein 1	1xTP-1 [C8]	232	0.0213984	0.00203653	3	High	High	Not Found	Not Found	Not Found	High
[K].YSNSALGHVNCTIK.[E]	Q9NQC3	RTN4	Reticulon-4	1xTP-1 [C11]	1101	9.2894e-07	6.06648e-05	5	High	High	High	Peak Found	High	High
[KR].AVLNPLCQVDYR.[A]	Q15437	SEC23B	Protein transport protein Sec23B	1xTP-1 [C7]	74	0.00186458	0.000265778	1	Not Found	High	Not Found	Not Found	Not Found	Not Found
[KR].NMMAACDPR.[H]	Q13885	TUBB2A	Tubulin beta-2A chain	2xOxidation [M2; M3]; 1xTP-1 [C6]	303	0.00156529	0.000126086	1	Not Found	Not Found	Not Found	Not Found	High	Not Found
[KR].NMMAACDPR.[H]	Q13885	TUBB2A	Tubulin beta-2A chain	1xTP-1 [C6]	303	0.0506347	0.0042136	4	High	High	Peak Found	High	Peak Found	High
[R].AAECNIVVTQPR.[R]	Q08211	DHX9	ATP-dependent RNA helicase A	1xTP-1 [C4]	438	0.00133607	0.000126086	4	High	High	High	Not Found	Not Found	High
[R].AAHACATVGNR.[G]	Q9Y2U9	KLHDC2	Kelch domain-containing protein 2	1xTP-1 [C5]	223	0.0519675	0.00430082	1	Peak Found	High	Peak Found	Peak Found	Peak Found	Peak Found
[R].AALEALGSCLNNKYSEGYPGK.[R]	P34897	SHMT2	Serine hydroxymethyltransferase, mitochondrial	1xTP-1 [C9]	91	4.36648e-08	6.06648e-05	4	High	Not Found	High	Peak Found	High	High
[R].AALKNPVKCAVSSK.[Y]	Q9H0S4	DDX47	Probable ATP-dependent RNA helicase DDX47	1xTP-1 [C9]	226	0.00317051	0.000582961	5	High	High	Peak Found	High	High	High
[R].AAPAGGFQNIACLR.[S]	Q9UBP6	METTL1	tRNA (guanine-N(7)-)-methyltransferase	1xTP-1 [C12]	136	0.107686	0.00805738	1	Not Found	High	Not Found	Not Found	Not Found	Not Found
[R].AAVEEGIVLGGGCALLR.[C]	P10809	HSPD1	60 kDa heat shock protein, mitochondrial	1xTP-1 [C13]	442	8.90456e-08	6.06648e-05	2	Not Found	Not Found	Not Found	High	Not Found	High
[R].AAVETLGVPCFLGGMAR.[G]	A1L0T0	ILVBL	2-hydroxyacyl-CoA lyase 2	1xTP-1 [C10]	315	0.0035152	0.000637478	2	Peak Found	Peak Found	Peak Found	Peak Found	High	High
[R].ACAAQTK.[A]	P17980	PSMC3	26S proteasome regulatory subunit 6A	1xTP-1 [C2]	240	0.0317911	0.00296632	8	High	High	High	High	High	High
[R].ADHQPLTEASYVNLPTIALCNTDSPLR.[Y]	P08865	RPSA	40S ribosomal protein SA	1xTP-1 [C20]	148	0.105606	0.00797873	1	Not Found	High	Not Found	Not Found	Not Found	Not Found
[R].AFFPCFDTPAVK.[Y]	Q9H4A4	RN	Aminopeptidase B	1xTP-1 [C5]	181	0.000389308	6.06648e-05	3	Peak Found	Peak Found	High	High	Peak Found	High
[R].AFLLDPDRCVVQR.[L]	Q9BTY7	HGH1	Protein HGH1 homolog	1xTP-1 [C9]	199	0.0098054	0.00109138	1	Peak Found	Peak Found	High	Peak Found	Peak Found	Peak Found
[R].AGAIAPCEVTVPAQNTGLGPEK.[T]	P05388	RPLP0	60S acidic ribosomal protein P1	1xTP-1 [C7]	119	3.88808e-07	6.06648e-05	5	Not Found	High	High	High	High	High
[R].AGGIETIANEFSDRCTPSVISFGSK.[N]	Q92598	HSPH1	Heat shock protein 105 kDa	1xTP-1 [C15]	34	5.32783e-05	6.06648e-05	1	Not Found	Not Found	Not Found	High	Not Found	Not Found
[R].AGIKVTVAGLAGKDPVQCSR.[D]	Q99497	PARK7	Parkinson disease protein 7	1xTP-1 [C18]	46	7.61684e-14	6.06648e-05	6	High	High	High	High	High	High
[R].AGKPVICATQMLESMIK.[K]	P14618	PKM	Pyruvate kinase PKM	2xOxidation [M11; M15]; 1xTP-1 [C7]	326	3.58742e-05	6.06648e-05	2	Peak Found	Peak Found	High	Not Found	High	Peak Found
[R].AGKPVICATQMLESMIK.[K]	P14618	PKM	Pyruvate kinase PKM	1xTP-1 [C7]	326	3.20058e-08	6.06648e-05	5	Peak Found	High	High	High	High	High
[R].AGKPVICATQMLESMIK.[K]	P14618	PKM	Pyruvate kinase PKM	1xOxidation [M]; 1xTP-1 [C7]	326	5.05022e-06	6.06648e-05	7	Peak Found	High	High	High	High	High
[R].AGKPVICATQMLESMIKKPRPTR.[A]	P14618	PKM	Pyruvate kinase PKM	2xOxidation [M11; M15]; 1xTP-1 [C7]	326	5.64111e-09	6.06648e-05	17	High	High	High	High	High	High
[R].AGKPVICATQMLESMIKKPRPTR.[A]	P14618	PKM	Pyruvate kinase PKM	1xTP-1 [C7]	326	2.3885e-07	6.06648e-05	7	High	High	High	High	High	High
[R].AGKPVICATQMLESMIKKPRPTR.[A]	P14618	PKM	Pyruvate kinase PKM	1xOxidation [M15]; 1xTP-1 [C7]	326	0.000469114	6.06648e-05	4	High	High	Peak Found	High	Peak Found	High
[R].AGLNCSTENMPIK.[I]	P05198	EIF2S1	Eukaryotic translation initiation factor 2 subunit 1	1xTP-1 [C5]	218	0.000510244	6.06648e-05	6	Peak Found	High	High	High	High	High
[R].AHAAQVTCVAASPHK.[D]	Q9BQA1	WDR77	Methylosome protein 50	1xTP-1 [C8]	172	0.061142	0.00499043	1	Not Found	Peak Found	Peak Found	Not Found	High	Peak Found
[R].AILPCIKGYDVIAQAQSGTGK.[T]	P60842	EIF4A1	Eukaryotic initiation factor 4A-I	1xTP-1 [C5]	67	3.40158e-08	6.06648e-05	2	High	High	Peak Found	Not Found	Not Found	Not Found
[R].AILPCQDTPSVK.[L]	P09960	LTA4H	Leukotriene A-4 hydrolase	1xTP-1 [C5]	147	0.000179568	6.06648e-05	6	High	High	High	High	High	High
[R].AITIANQTNCPLYITK.[V]	Q16555	DPYSL2	Dihydropyrimidinase-related protein 2	1xTP-1 [C10]	248	0.027084	0.00247403	1	Not Found	Peak Found	Peak Found	Peak Found	High	Peak Found
[R].ALALNCFAPINDQEGAEAK.[D]	Q96T88	UHRF1	E3 ubiquitin-protein ligase UHRF1	1xTP-1 [C6]	512	2.71135e-05	6.06648e-05	6	High	High	High	High	High	High
[R].ALCTPGYNAR.[A]	Q9BTY7	HGH1	Protein HGH1 homolog	1xTP-1 [C3]	163	0.0276088	0.00252576	3	Peak Found	High	Peak Found	Peak Found	High	High
[R].ALDCSSSIR.[Q]	O94776	MTA2	Metastasis-associated protein MTA2	1xTP-1 [C4]	209	0.121041	0.00865744	1	Not Found	Peak Found	Peak Found	High	Peak Found	Peak Found
[R].ALDCSSSIRQPSLHMSAAAASR.[D]	O94776	MTA2	Metastasis-associated protein MTA2	1xTP-1 [C4]	209	8.84762e-07	6.06648e-05	3	High	Not Found	High	Not Found	Not Found	High
[R].ALLVTASQCQQPAENK.[L]	Q01518	CAP1	Adenylyl cyclase-associated protein 1	1xTP-1 [C9]	93	0.000375487	6.06648e-05	2	Not Found	Not Found	Not Found	High	Not Found	High
[R].ALQSLACGKPTQR.[V]	Q13618	CUL3	Cullin-3	1xTP-1 [C7]	636	0.000931962	0.000126086	5	High	High	Not Found	High	High	High
[R].ALVDGPCTQVR.[R]	P50914	RPL14	60S ribosomal protein L14	1xTP-1 [C7]	42	0.00038004	6.06648e-05	1	High	Peak Found	Peak Found	Peak Found	Peak Found	Peak Found
[R].ANACNSVIK.[Q]	P16615	ATP2A2	Sarcoplasmic/endoplasmic reticulum calcium ATPase 2	1xTP-1 [C4]	471	0.0180449	0.00168587	4	High	High	Peak Found	High	High	Peak Found
[R].ANVPNKVIQCFAETGQVQK.[I]	Q00610	CLTC	Clathrin heavy chain 1	1xTP-1 [C10]	491	4.66755e-07	6.06648e-05	4	High	Peak Found	High	Peak Found	High	High
[R].APQCLGKFIEIAAR.[K]	Q00839	HNRNPU	Heterogeneous nuclear ribonucleoprotein U	1xTP-1 [C4]	562	5.29552e-05	6.06648e-05	5	High	High	High	High	Peak Found	High
[R].APQCYPSSVNSAR.[T]	Q9H9A5	CNOT10	CCR4-NOT transcription complex subunit 10	1xTP-1 [C4]	633	0.00776957	0.00100143	1	Peak Found	Peak Found	Peak Found	Peak Found	High	Not Found
[R].APSVANVGSHCDLSLK.[I]	P21333	FLNA	Filamin-A	1xTP-1 [C11]	2160	3.26166e-10	6.06648e-05	3	Not Found	Not Found	Not Found	High	High	High
[R].APSVANVGSHCDLSLKIPEISIQDMTAQVTSPSGK.[T]	P21333	FLNA	Filamin-A	1xTP-1 [C11]	2160	4.22806e-05	6.06648e-05	1	Not Found	Not Found	Not Found	Not Found	Not Found	High
[R].APSVATVGSICDLNLK.[I]	O75369	FLNB	Filamin-B	1xTP-1 [C11]	2115	9.78611e-05	6.06648e-05	5	High	High	High	Peak Found	High	High
[R].APVFLQFCDSGGR.[G]	Q4ZIN3	TMEM259	Membralin	1xTP-1 [C8]	129	0.0474524	0.00408505	2	Peak Found	High	Not Found	Peak Found	High	Peak Found
[R].AQRPQSCTSVGR.[V]	Q9NYZ3	GTSE1	G2 and S phase-expressed protein 1	1xTP-1 [C7]	478	0.0719431	0.00595785	1	Peak Found	Peak Found	Peak Found	Peak Found	Peak Found	High
[R].AVAILCNHQR.[A]	P11387	TOP1	DNA topoisomerase 1	1xTP-1 [C6]	630	0.145963	0.00986245	1	Not Found	Not Found	Not Found	Not Found	High	Not Found
[R].AVAILCNHQRAPPK.[T]	P11387	TOP1	DNA topoisomerase 1	1xTP-1 [C6]	630	0.00285919	0.000454455	1	Not Found	Peak Found	Not Found	High	Peak Found	Not Found
[R].AVCLLTGASR.[G]	P35270	SPR	Sepiapterin reductase	1xTP-1 [C3]	10	0.00355572	0.000637478	3	High	Peak Found	Peak Found	High	High	Peak Found
[R].AVIPMSCITNGSGANR.[K]	Q9HC35	EML4	Echinoderm microtubule-associated protein-like 4	1xTP-1 [C7]	82	0.000140029	6.06648e-05	3	Peak Found	Peak Found	High	Peak Found	High	High
[R].AVLCPPPVK.[K]	P63000	RAC1	Ras-related C3 botulinum toxin substrate 1	1xTP-1 [C4]	178	0.043335	0.00365501	4	High	Peak Found	High	High	Peak Found	High
[R].AVLCPPPVKK.[R]	P63000	RAC1	Ras-related C3 botulinum toxin substrate 1	1xTP-1 [C4]	178	0.0257343	0.00242546	5	Peak Found	High	High	High	High	High
[R].AVLSCIAPSAK.[T]	Q9BPX3	NCAPG	Condensin complex subunit 3	1xTP-1 [C5]	202	0.0010368	0.000126086	4	Peak Found	Peak Found	High	High	High	High
[R].CHQPLAR.[A]	Q15942	ZYX	Zyxin	1xTP-1 [C1]	387	0.00547147	0.000852955	9	High	High	High	High	High	High
[R].CKHFELGGDK.[K]	Q969Q0	RPL36AL	60S ribosomal protein L36a-like	1xTP-1 [C1]	88	0.00468266	0.000852955	3	High	High	Peak Found	High	Peak Found	Peak Found
[R].CKHFELGGDKK.[R]	Q969Q0	RPL36AL	60S ribosomal protein L36a-like	1xTP-1 [C1]	88	0.00365908	0.000637478	6	High	Peak Found	High	High	High	High
[R].CLPGKK.[G]	P25205	MCM3	DNA replication licensing factor MCM3	1xTP-1 [C1]	243	0.0187391	0.00173672	1	Peak Found	High	Peak Found	Peak Found	Peak Found	Peak Found
[R].CVVLNFR.[K]	Q9UMR7	CLEC4A	C-type lectin domain family 4 member A	1xTP-1 [C1]	203	0.0921194	0.00732902	1	Peak Found	Peak Found	Peak Found	Peak Found	High	Peak Found
[R].DGGVQACFSR.[S]	P08754	GNAI3	Guanine nucleotide-binding protein G(i) subunit alpha	1xTP-1 [C7]	139	0.0419542	0.00346179	2	Peak Found	High	Peak Found	Peak Found	Peak Found	High
[R].DHRPPCAQEAPR.[N]	Q13501	SQSTM1	Sequest	1xTP-1 [C6]	113	0.006707	0.000949718	2	High	High	Peak Found	Peak Found	Peak Found	Peak Found
[R].DIAQQLQATCTSLGSSIQGLPTNVK.[D]	O60664	PLIN3	Perilipin-3	1xTP-1 [C10]	341	0.0122777	0.00124196	1	Peak Found	Peak Found	High	Peak Found	Not Found	Peak Found
[R].DKLCGPYEK.[F]	Q92598	HSPH1	Heat shock protein 105 kDa	1xTP-1 [C4]	650	0.141348	0.00973359	1	Peak Found	Peak Found	Peak Found	High	Peak Found	Peak Found
[R].DKPLKDVIIADCGK.[I]	P23284	PPIB	Peptidyl-prolyl cis-trans isomerase B	1xTP-1 [C12]	202	0.000121781	6.06648e-05	4	High	High	High	Peak Found	Peak Found	High
[R].DLMACAQTGSGK.[T]	O00571	DDX3X	ATP-dependent RNA helicase DDX3X	1xTP-1 [C5]	223	1.67614e-05	6.06648e-05	1	Not Found	Not Found	Not Found	Not Found	High	Not Found
[R].DLNCVPEIADTLGAVAK.[Q]	O14744	PRMT5	Protein arginine N-methyltransferase 5	1xTP-1 [C4]	22	0.109807	0.0082794	2	Not Found	Peak Found	High	High	Not Found	Peak Found
[R].DLPIKLNQWCNVVR.[W]	P07814	EPRS1	Bifunctional glutamate/proline--tRNA ligase	1xTP-1 [C10]	1148	0.00363817	0.000637478	2	Not Found	Peak Found	Not Found	High	Not Found	High
[R].DLTTAGAVTQCYR.[D]	Q02543	RPL18A	60S ribosomal protein L18a	1xTP-1 [C11]	109	0.008003	0.00109138	1	Not Found	Not Found	Not Found	Not Found	High	Not Found
[R].DVCTELLPLIKPQGR.[V]	P16152	CBR1	Carbonyl reductase [NADPH] 1	1xTP-1 [C3]	122	2.15356e-07	6.06648e-05	6	High	High	High	High	High	High
[R].DVQIGDIVTVGECRPLSK.[T]	P62280	RPS11	40S ribosomal protein S11	1xTP-1 [C13]	131	0.028144	0.00262685	1	Not Found	High	Not Found	Not Found	Not Found	Not Found
[R].ECACAGLAR.[L]+C2C8:C3254	Q7Z4Q2	HEATR3	HEAT repeat-containing protein 3	2xTP-1 [C2; C4]	59	0.0976752	0.00753892	1	Not Found	High	Not Found	Peak Found	Peak Found	Peak Found
[R].EIVHIQAGQCGNQIGAK.[F]	Q13885	TUBB2A	Tubulin beta-2A chain	1xTP-1 [C10]	12	4.02716e-05	6.06648e-05	4	High	High	Peak Found	Peak Found	Peak Found	High
[R].EIVHIQAGQCGNQIGTK.[F]	Q9BUF5	TUBB6	Tubulin beta-6 chain	1xTP-1 [C10]	12	6.05378e-05	6.06648e-05	2	Peak Found	Peak Found	High	Not Found	High	Peak Found
[R].EKTACAINK.[V]	Q52LJ0	FAM98B	Protein FAM98B	1xTP-1 [C5]	292	0.0591848	0.00480704	2	High	Peak Found	Peak Found	Peak Found	Peak Found	High
[R].EKTCPLLLR.[V]	O00422	SAP18	Histone deacetylase complex subunit SAP18	1xTP-1 [C4]	26	0.150715	0.00988508	2	Peak Found	High	Peak Found	Peak Found	High	Not Found
[R].ELHGQNPVVTPCNK.[Q]	Q16630	CPSF6	Cleavage and polyadenylation specificity factor subunit 6	1xTP-1 [C12]	159	0.0247678	0.00222929	2	High	Not Found	Not Found	Not Found	High	Not Found
[R].ELSGTIKEILGTAQSVGCNVDGR.[H]	P30050	RPL12	60S ribosomal protein L12	1xTP-1 [C18]	141	0.00372252	0.000637478	1	High	Not Found	Not Found	Not Found	Not Found	Not Found
[R].FACHSASLTVR.[N]	Q15233	NONO	Non-POU domain-containing octamer-binding protein	1xTP-1 [C3]	145	0.00563217	0.000852955	2	Peak Found	Peak Found	Peak Found	Peak Found	High	High
[R].FDFLCQYHKPASK.[I]	Q9NTK5	OLA1	Obg-like ATPase 1	1xTP-1 [C5]	75	0.00543991	0.000852955	2	High	Peak Found	High	Peak Found	Peak Found	Peak Found
[R].FFSDCKIQNGAQGIR.[F]	P31943	HNRNPH1	Heterogeneous nuclear ribonucleoprotein H	1xTP-1 [C5]	34	5.87244e-05	6.06648e-05	6	High	High	High	High	High	High
[R].FGEVVDCTIKTDPVTGR.[S]	O14979	HNRNPDL	Heterogeneous nuclear ribonucleoprotein D-like	1xTP-1 [C7]	177	0.0468407	0.00408505	2	Not Found	Not Found	Not Found	High	Not Found	High
[R].FNAHGDANTIVCNSK.[D]	P09382	LGALS1	Galectin-1	1xTP-1 [C12]	61	8.95209e-06	6.06648e-05	6	High	High	High	High	High	High
[R].FSCIIGPNGSGK.[S]	Q9NTJ3	SMC4	Structural maintenance of chrom	1xTP-1 [C3]	110	2.47474e-05	6.06648e-05	3	Peak Found	High	High	High	Peak Found	Peak Found
[R].GCHLLVATPGR.[L]	O00571	DDX3X	ATP-dependent RNA helicase DDX3X	1xTP-1 [C2]	317	0.00140035	0.000126086	3	Peak Found	High	Peak Found	High	Peak Found	High
[R].GCTATLGNFAK.[A]	P15880	RPS2	40S ribosomal protein S2	1xTP-1 [C2]	229	0.000241616	6.06648e-05	8	High	High	High	High	High	High
[R].GDFCIQVGR.[N]	P15531	NME1	Nucle	1xTP-1 [C4]	109	0.0903387	0.0072515	5	Peak Found	High	High	High	High	High
[R].GDGPICLVLAPTR.[E]	Q92841	DDX17	Probable ATP-dependent RNA helicase DDX17	1xTP-1 [C6]	170	0.00120174	0.000126086	7	High	High	High	High	High	High
[R].GEPGRPALYFCGSIR.[G]	O43598	DNPH1	2'-deoxynucle	1xTP-1 [C11]	26	0.00528496	0.000852955	2	Not Found	High	Peak Found	Peak Found	Peak Found	High
[R].GGGGGPCGFQPASR.[G]	Q96QR8	PURB	Transcriptional activator protein Pur-beta	1xTP-1 [C7]	17	0.0326189	0.00310692	4	Peak Found	High	High	Peak Found	High	High
[R].GHYNNVSCAVFHPR.[Q]	P53621	COPA	Coatomer subunit alpha	1xTP-1 [C8]	254	0.00219324	0.000388332	2	Not Found	High	Not Found	Peak Found	High	Not Found
[R].GLCAIAQAESLR.[Y]	P23396	RPS3	40S ribosomal protein S3	1xTP-1 [C3]	97	0.000888769	0.000126086	3	High	High	Not Found	High	Not Found	Not Found
[R].GLGDCLVK.[I]	P12236	SLC25A6	ADP/ATP translocase 3	1xTP-1 [C5]	160	0.14226	0.00973359	1	High	Peak Found	Peak Found	Peak Found	Peak Found	Peak Found
[R].GLGLSPDLVVCR.[C]	P17812	CTPS1	CTP synthase 1	1xTP-1 [C11]	216	0.00484711	0.000852955	5	High	High	High	High	Peak Found	High
[R].GLKPSCTIIPLMK.[K]	P49327	FASN	Fatty acid synthase	1xTP-1 [C6]	779	0.00772376	0.00100143	6	High	High	High	High	High	High
[R].GLPWSCSADEVQR.[F]	P31943	HNRNPH1	Heterogeneous nuclear ribonucleoprotein H	1xTP-1 [C6]	22	1.93987e-05	6.06648e-05	6	High	High	High	High	High	High
[R].GNHECASINR.[I]	P62136	PPP1CA	Serine/threonine-protein ph	1xTP-1 [C5]	126	0.0719431	0.00595785	1	Peak Found	Peak Found	Peak Found	High	Peak Found	Peak Found
[R].GTPCERPVR.[V]	P49585	PCYT1A	Choline-ph	1xTP-1 [C4]	73	0.046237	0.00394283	1	Peak Found	Peak Found	Peak Found	Peak Found	Peak Found	High
[R].GVACTQPR.[R]	O43143	DHX15	Pre-mRNA-splicing factor ATP-dependent RNA helicase DHX15	1xTP-1 [C4]	190	0.0218094	0.00203653	3	High	Peak Found	Peak Found	Peak Found	High	High
[R].GVVCDKRNPNGIR.[V]	Q16719	KYNU	Kynureninase	1xTP-1 [C4]	425	0.0163232	0.00158855	2	Peak Found	High	Peak Found	Not Found	Peak Found	High
[R].GYGLFAGPCK.[V]	P78527	PRKDC	DNA-dependent protein kinase catalytic subunit	1xTP-1 [C9]	373	0.0332543	0.00310692	2	Peak Found	Peak Found	Peak Found	Not Found	High	High
[R].HGFCGIPITDTGR.[M]	P12268	IMPDH2	Inosine-5'-monophosphate dehydrogenase 2	1xTP-1 [C4]	140	9.96613e-05	6.06648e-05	2	Peak Found	Peak Found	High	High	Not Found	Peak Found
[R].HWYSDMRTGECQGLSPITR.[-]	Q96MC9	C1orf147	Uncharacterized protein C1orf147	1xOxidation [M6]; 1xTP-1 [C11]	262	0.117178	0.00848496	1	Peak Found	Peak Found	Peak Found	Not Found	High	Peak Found
[R].IACGPPQAK.[L]	Q9Y520	PRRC2C	Protein PRRC2C	1xTP-1 [C3]	223	0.00607367	0.000904544	4	Peak Found	High	High	High	Peak Found	High
[R].IAPRPASGPIRPIVRCPTVR.[Y]	P26373	RPL13	60S rib	1xTP-1 [C16]	61	0.135989	0.00948299	1	Peak Found	High	Not Found	Not Found	Not Found	Peak Found
[R].IAQLICER.[I]	P33316	DUT	Deoxyuridine 5'-triph	1xTP-1 [C6]	222	0.00484711	0.000852955	2	Peak Found	High	Peak Found	Peak Found	High	Peak Found
[R].ICANKYMVK.[S]	P27635	RPL10	60S ribosomal protein L10	1xOxidation [M7]; 1xTP-1 [C2]	71	0.0257343	0.00242546	2	Peak Found	High	Peak Found	Peak Found	High	Peak Found
[R].ICKSPNER.[A]	Q14204	DYNC1H1	Cytoplasmic dynein 1 heavy chain 1	1xTP-1 [C2]	4170	0.0536838	0.00433597	2	High	Peak Found	High	Peak Found	Peak Found	Peak Found
[R].ICSKPVVLPK.[G]	P78527	PRKDC	DNA-dependent protein kinase catalytic subunit	1xTP-1 [C2]	491	0.0350118	0.00314487	3	High	Peak Found	Not Found	Not Found	High	High
[R].IFCKGQVSTATFLESCGVADLITTCYGGR.[N]	Q8N335	GPD1L	Glycerol-3-ph	2xCarbamidomethyl [C16; C25]; 1xTP-1 [C3]	245	0.114173	0.00844532	2	High	Peak Found	Not Found	High	Peak Found	Peak Found
[R].IGCIITAR.[K]	Q12904	AIMP1	Aminoacyl tRNA synthase complex-interacting multifunctional protein 1	1xTP-1 [C3]	161	0.0678511	0.00549183	5	High	High	High	High	High	Peak Found
[R].IHEGCEEPATHNALAK.[I]	Q00610	CLTC	Clathrin heavy chain 1	1xTP-1 [C5]	870	0.00132823	0.000126086	8	High	High	High	High	High	High
[R].IINPITMQCIK.[H]	O75530	EED	Polycomb protein EED	1xTP-1 [C9]	182	0.133381	0.00940175	1	Not Found	Peak Found	Not Found	Not Found	High	Peak Found
[R].IIPGFMCQGGDFTR.[H]	P62937	PPIA	Peptidyl-prolyl cis-trans isomerase A	1xTP-1 [C7]	62	0.000320992	6.06648e-05	7	High	Peak Found	High	High	High	High
[R].IIPGFMCQGGDFTR.[H]	P62937	PPIA	Peptidyl-prolyl cis-trans isomerase A	1xOxidation [M6]; 1xTP-1 [C7]	62	0.0276088	0.00252576	6	High	High	High	High	High	High
[R].IISANGCK.[V]	P05023	ATP1A1	Sodium/potassium-transporting ATPase subunit alpha-1	1xTP-1 [C7]	211	0.093326	0.00732902	2	High	High	Peak Found	Peak Found	Peak Found	Peak Found
[R].IIYGGSVTGATCK.[E]	P60174	TPI1	Triosephosphate isomerase	1xTP-1 [C12]	218	0.00992429	0.00109138	3	High	Peak Found	Peak Found	Not Found	High	High
[R].IKAAVPSIKFCLDNGAK.[S]	P00558	PGK1	Phosphoglycerate kinase 1	1xTP-1 [C11]	50	0.00190843	0.000334782	2	Peak Found	Not Found	High	High	Not Found	Peak Found
[R].IKNCLNPQFSK.[T]	O75131	CPNE3	Copine-3	1xTP-1 [C4]	54	0.0627544	0.00508271	2	Peak Found	Peak Found	Peak Found	Peak Found	High	High
[R].INFYCPGSALGR.[N]	Q9Y5B9	SUPT16H	FACT complex subunit SPT16	1xTP-1 [C5]	574	0.0110671	0.00113928	1	Not Found	Peak Found	Peak Found	Not Found	High	Peak Found
[R].INISEGNCPER.[I]	Q15366	PCBP2	Poly(rC)-binding protein 2	1xTP-1 [C8]	54	0.00227065	0.000388332	3	High	Peak Found	High	High	Peak Found	Peak Found
[R].INLANCTSR.[Q]	Q9NQW6	ANLN	Anillin	1xTP-1 [C6]	1037	0.109807	0.0082794	2	High	Peak Found	Peak Found	Peak Found	Peak Found	High
[R].INNINILVCTPGR.[L]	Q13206	DDX10	Probable ATP-dependent RNA helicase DDX10	1xTP-1 [C9]	196	0.0112026	0.00113928	1	Not Found	Not Found	Not Found	Not Found	High	Not Found
[R].IPTPLNTSGVQVICMK.[G]	Q96CW1	AP2M1	AP-2 complex subunit mu	1xTP-1 [C14]	337	8.10561e-05	6.06648e-05	2	Not Found	Peak Found	Not Found	High	High	Peak Found
[R].IPTPLNTSGVQVICMK.[G]	Q96CW1	AP2M1	AP-2 complex subunit mu	1xOxidation [M15]; 1xTP-1 [C14]	337	4.23416e-07	6.06648e-05	3	Peak Found	High	Not Found	Peak Found	High	High
[R].ISCMSKPPAPNPTPPR.[N]	P46734	MAP2K3	Dual specificity mitogen-activated protein kinase kinase 3	1xTP-1 [C3]	29	2.7662e-09	6.06648e-05	6	High	High	High	High	High	High
[R].ISCMSKPPAPNPTPPR.[N]	P46734	MAP2K3	Dual specificity mitogen-activated protein kinase kinase 3	1xOxidation [M4]; 1xTP-1 [C3]	29	4.98296e-05	6.06648e-05	6	High	High	High	High	High	High
[R].ISCTIANR.[C]	P02751	FN1	Fibronectin	1xTP-1 [C3]	135	0.061142	0.00499043	4	High	High	High	Peak Found	Peak Found	High
[R].ISLGLPVGAVINCADNTGAK.[N]	P62829	RPL23	60S ribosomal protein L23	1xTP-1 [C13]	28	4.58885e-11	6.06648e-05	9	High	High	High	High	High	High
[R].ISSVLAGGSCR.[A]	P02533	KRT14	Keratin, type I cyt	1xTP-1 [C10]	40	0.0145021	0.00144184	1	Peak Found	Peak Found	Peak Found	Not Found	Peak Found	High
[R].IVGYFVSGCDPSIMGIGPVPAISGALKK.[A]	P42765	ACAA2	3-ketoacyl-CoA thiolase, mitochondrial	1xTP-1 [C9]	287	0.000408519	6.06648e-05	1	Not Found	Not Found	Peak Found	Not Found	High	Not Found
[R].IWSVPNASCVQVVR.[A]	Q9UMS4	PRPF19	Pre-mRNA-processing factor 19	1xTP-1 [C9]	298	2.79735e-06	6.06648e-05	5	Peak Found	High	High	High	High	High
[R].KACGDSTLTQITAGLDPVGR.[I]	P62879	GNB2	Guanine nucleotide-binding protein G(I)/G(S)/G(T) subunit beta-2	1xTP-1 [C3]	25	3.13784e-05	6.06648e-05	1	Not Found	Not Found	Not Found	Not Found	High	Not Found
[R].KAQCPIVER.[L]	P46782	RPS5	40S ribosomal protein S5	1xTP-1 [C4]	66	0.0359263	0.00318806	4	High	High	High	Peak Found	Peak Found	High
[R].KAVVVCPK.[D]	Q00839	HNRNPU	Heterogeneous nuclear ribonucleoprotein U	1xTP-1 [C6]	607	0.000111855	6.06648e-05	3	Peak Found	High	High	Peak Found	Peak Found	High
[R].KAVVVCPKDEDYK.[Q]	Q00839	HNRNPU	Heterogeneous nuclear ribonucleoprotein U	1xTP-1 [C6]	607	0.00702902	0.000949718	5	High	High	Peak Found	High	High	High
[R].KCEPIIMTVPR.[K]	Q6QEF8	CORO6	Coronin-6	1xTP-1 [C2]	343	0.00666787	0.000949718	3	High	Peak Found	High	High	Not Found	Peak Found
[R].KCNTDQAGRPK.[C]	P33992	MCM5	DNA replication licensing factor MCM5	1xTP-1 [C2]	197	0.00171861	0.000195391	6	High	High	Peak Found	High	High	High
[R].KDGNASGTTLLEALDCILPPTRPTDKPLR.[L]	P68104	EEF1A1	Elongation factor 1-alpha 1	1xTP-1 [C16]	234	2.57204e-10	6.06648e-05	5	High	High	High	High	Peak Found	High
[R].KDGNASGTTLLEALDCILPPTRPTDKPLRLPLQDVYK.[I]	P68104	EEF1A1	Elongation factor 1-alpha 1	1xTP-1 [C16]	234	1.04867e-14	6.06648e-05	6	High	High	High	High	High	High
[R].KELEQVCNPIISGLYQGAGGPGPGGFGAQGPK.[G]	P0DMV9	HSPA1B	Heat shock 70 kDa protein 1B	1xTP-1 [C7]	603	2.18271e-11	6.06648e-05	2	Not Found	Not Found	Not Found	Not Found	High	High
[R].KIAELCDDPKER.[D]	P18206	VCL	Vinculin	1xTP-1 [C6]	422	0.0874475	0.00707814	1	Peak Found	Peak Found	Peak Found	Peak Found	Peak Found	High
[R].KITINPGCVVVDGMPPGVSFK.[A]	P78347	GTF2I	General transcription factor II-I	1xTP-1 [C8]	903	0.00125234	0.000126086	2	Not Found	Peak Found	Peak Found	Peak Found	High	High
[R].KIVFVPGCSIPLTIVK.[S]	P54136	RARS1	Arginine--tRNA ligase, cytoplasmic	1xTP-1 [C8]	369	0.00719619	0.000949718	5	Peak Found	High	High	High	High	High
[R].KIWCFGPDGTGPNILTDITK.[G]	P13639	EEF2	Elongation factor 2	1xTP-1 [C4]	651	6.98584e-11	6.06648e-05	6	High	High	High	High	High	High
[R].KKAVLFCLSEDK.[K]	P23528	CFL1	Cofilin-1	1xTP-1 [C7]	39	0.0265695	0.00242546	1	Peak Found	Peak Found	Peak Found	Peak Found	Not Found	High
[R].KLFAPQQILQCSPAN.[-]	P04183	TK1	Thymidine kinase, cyt	1xTP-1 [C11]	230	0.000259808	6.06648e-05	2	Not Found	High	Peak Found	Not Found	High	Peak Found
[R].KLLEKCAMTALSSK.[L]	Q99832	CCT7	T-complex protein 1 subunit eta	1xTP-1 [C6]	158	0.00432088	0.000753666	3	Peak Found	High	Peak Found	Peak Found	High	High
[R].KLLEKCAMTALSSK.[L]	Q99832	CCT7	T-complex protein 1 subunit eta	1xOxidation [M8]; 1xTP-1 [C6]	158	0.00339637	0.000637478	5	High	High	Not Found	High	High	High
[R].KLRQELGICPAVK.[Q]	P27708	CAD	CAD protein	1xTP-1 [C9]	897	0.0678511	0.00549183	1	Not Found	Not Found	Not Found	Not Found	High	Not Found
[R].KLSYAEVCQKPPK.[E]	Q71RC2	LARP4	La-related protein 4	1xTP-1 [C8]	623	0.0964122	0.00749758	1	Peak Found	High	Peak Found	Peak Found	Peak Found	Peak Found
[R].KLSYAEVCQKPPKEPSSVLVQPLR.[E]	Q71RC2	LARP4	La-related protein 4	1xTP-1 [C8]	623	0.0529905	0.00430082	1	Not Found	Not Found	Not Found	Not Found	High	Not Found
[R].KMCLFAGFQR.[K]	Q00839	HNRNPU	Heterogeneous nuclear ribonucleoprotein U	1xTP-1 [C3]	594	0.0311844	0.00296632	2	Not Found	Peak Found	Peak Found	Peak Found	High	High
[R].KNVLCGNIPPDLFAR.[M]	P23193	TCEA1	Transcription elongation factor A protein 1	1xTP-1 [C5]	212	3.25741e-06	6.06648e-05	3	Peak Found	High	Not Found	Peak Found	High	High
[R].KPASFMTSICDER.[G]	P53396	ACLY	ATP-citrate synthase	1xTP-1 [C10]	845	0.0250857	0.00233263	1	Not Found	Not Found	Not Found	Not Found	High	Not Found
[R].KPTDGASSSNCVTDISHLVR.[K]	P49321	NASP	Nuclear autoantigenic sperm protein	1xTP-1 [C11]	708	2.88485e-07	6.06648e-05	3	High	Peak Found	Peak Found	Not Found	High	High
[R].KPVVGQCTIER.[L]	Q9NZM1	MYOF	Myoferlin	1xTP-1 [C7]	1392	0.00345528	0.000637478	4	Peak Found	High	High	High	High	Peak Found
[R].KSMSVYCTPNKPSR.[T]	P16615	ATP2A2	Sarcoplasmic/endoplasmic reticulum calcium ATPase 2	1xTP-1 [C7]	498	0.0122027	0.00124196	3	Peak Found	Peak Found	High	Peak Found	High	High
[R].KSMSVYCTPNKPSR.[T]	P16615	ATP2A2	Sarcoplasmic/endoplasmic reticulum calcium ATPase 2	1xOxidation [M3]; 1xTP-1 [C7]	498	0.000847538	0.000126086	7	High	High	High	High	High	High
[R].KSNIHCNTIAPNAGSR.[M]	P51659	HSD17B4	Peroxisomal multifunctional enzyme type 2	1xTP-1 [C6]	189	0.000286193	6.06648e-05	6	Peak Found	Peak Found	High	High	High	High
[R].KTCAAQLVSYPGK.[N]	Q09161	NCBP1	Nuclear cap-binding protein subunit 1	1xTP-1 [C3]	332	1.96487e-06	6.06648e-05	5	Peak Found	High	High	High	High	High
[R].KTCTTVAFTQVNSEDKGALAK.[L]	P62424	RPL7A	60S ribosomal protein L7A	1xTP-1 [C3]	199	8.32483e-07	6.06648e-05	1	High	Not Found	Not Found	Not Found	Not Found	Not Found
[R].KTFDLYANVRPCVSIEGYK.[T]	P50213	IDH3A	Isocitrate dehydrogenase [NAD] subunit alpha, mitochondrial	1xTP-1 [C12]	127	0.0238389	0.00218089	2	Not Found	High	Not Found	Not Found	High	Not Found
[R].KTPCGEGSK.[T]	P60866	RPS20	40S ribosomal protein S20	1xTP-1 [C4]	70	0.0388203	0.00331644	4	High	High	Peak Found	High	Peak Found	High
[R].KVACIGAWHPAR.[V]	P39023	RPL3	60S ribosomal protein L3	1xTP-1 [C4]	253	0.000730409	0.000126086	4	High	High	Peak Found	High	High	Peak Found
[R].KVCGDSDKGFVVINQK.[G]	P40227	CCT6A	T-complex protein 1 subunit zeta	1xTP-1 [C3]	282	4.57609e-05	6.06648e-05	3	High	Not Found	Not Found	Not Found	High	High
[R].KVMSQNFTNCHTK.[I]	Q13283	G3BP1	Ras GTPase-activating protein-binding protein 1	1xTP-1 [C10]	73	0.000320992	6.06648e-05	6	High	High	High	High	High	High
[R].KVVPCLVTPVTGR.[E]	O75369	FLNB	Filamin-B	1xTP-1 [C5]	991	0.00015619	6.06648e-05	6	High	High	High	High	High	High
[R].KVVVCDNGTGFVK.[C]	P61160	ACTR2	Actin-related protein 2	1xTP-1 [C5]	11	0.00285919	0.000454455	1	High	Peak Found	Peak Found	Peak Found	Peak Found	Peak Found
[R].LACDVDQVTR.[Q]	P78527	PRKDC	DNA-dependent protein kinase catalytic subunit	1xTP-1 [C3]	974	0.0167366	0.00158855	4	High	High	High	High	Peak Found	Peak Found
[R].LALAPAARPPRPGACSR.[C]	Q7Z7A3	CTU1	Cytoplasmic tRNA 2-thiolation protein 1	1xTP-1 [C15]	287	0.00501754	0.000852955	2	Peak Found	Not Found	Not Found	Not Found	High	High
[R].LCPNSTGAEIR.[S]	P35998	PSMC2	26S proteasome regulatory subunit 7	1xTP-1 [C2]	377	0.00573097	0.000852955	1	Peak Found	High	Peak Found	Peak Found	Peak Found	Peak Found
[R].LCSGVLGTVVHGK.[V]	Q9Y6C9	MTCH2	Mitochondrial carrier homolog 2	1xTP-1 [C2]	79	0.000200266	6.06648e-05	2	Peak Found	Peak Found	High	High	Peak Found	Peak Found
[R].LFACSNK.[I]	P06396	GSN	Gelsolin	1xTP-1 [C4]	672	0.0903387	0.0072515	1	High	Peak Found	Peak Found	Peak Found	Not Found	Peak Found
[R].LFVSDGVPGCLPVLAAAGR.[A]	P56192	MARS1	Methionine--tRNA ligase, cytoplasmic	1xTP-1 [C10]	12	2.21789e-05	6.06648e-05	2	Peak Found	Peak Found	Not Found	Peak Found	High	High
[R].LGKHDVTCTVSGGGR.[S]	P82933	MRPS9	28S ribosomal protein S9, mitochondrial	1xTP-1 [C8]	330	0.0220879	0.00203653	3	Peak Found	High	Peak Found	Peak Found	High	High
[R].LGPNYLHIPVNCPYR.[A]	P04040	CAT	Catalase	1xTP-1 [C12]	377	0.00010917	6.06648e-05	6	High	High	High	High	High	High
[R].LGTCKPGR.[D]	Q9H0X9	OSBPL5	Oxysterol-binding protein-related protein 5	1xTP-1 [C4]	253	0.0897529	0.0072515	1	Peak Found	Peak Found	Peak Found	Peak Found	Peak Found	High
[R].LGTDESKFNAVLCSR.[S]	P50995	ANXA11	Annexin A11	1xTP-1 [C13]	384	0.00754344	0.00100143	2	Peak Found	High	High	Peak Found	Not Found	Peak Found
[R].LGTQTFCSR.[V]	Q9BSJ8	ESYT1	Extended synaptotagmin-1	1xTP-1 [C7]	370	0.128308	0.00919039	2	Peak Found	Peak Found	High	Not Found	Not Found	High
[R].LIAGCIGKPLGEQFR.[K]	Q9HAV4	XPO5	Exportin-5	1xTP-1 [C5]	1157	6.17436e-06	6.06648e-05	5	High	Not Found	High	High	High	High
[R].LIAGCIGKPLGEQFRK.[E]	Q9HAV4	XPO5	Exportin-5	1xTP-1 [C5]	1157	3.63481e-06	6.06648e-05	4	Not Found	High	High	Peak Found	High	High
[R].LIASYCNVGDIEGASK.[I]	P42704	LRPPRC	Leucine-rich PPR motif-containing protein, mitochondrial	1xTP-1 [C6]	208	0.0215345	0.00203653	1	Peak Found	Peak Found	Peak Found	Not Found	Peak Found	High
[R].LIDLCQPTQK.[K]	Q14683	SMC1A	Structural maintenance of chrom	1xTP-1 [C5]	523	0.109096	0.00824452	1	High	Peak Found	Peak Found	Peak Found	Peak Found	Peak Found
[R].LKKCHIAVGSPGR.[I]	Q9UHI6	DDX20	Probable ATP-dependent RNA helicase DDX20	1xTP-1 [C4]	181	0.106295	0.0080221	1	Peak Found	Peak Found	High	Peak Found	Peak Found	Peak Found
[R].LKSTCIYGGAPK.[G]	Q92841	DDX17	Probable ATP-dependent RNA helicase DDX17	1xTP-1 [C5]	200	0.00819517	0.00109138	4	Peak Found	High	Peak Found	High	High	High
[R].LLGSTIPLCSAQWER.[M]	P50416	CPT1A	Carnitine O-palmitoyltransferase 1, liver isoform	1xTP-1 [C9]	304	0.101564	0.00766655	1	Not Found	Not Found	High	Not Found	Not Found	Not Found
[R].LLLCGGAPLSATTQR.[F]	O95573	ACSL3	Long-chain-fatty-acid--CoA ligase 3	1xTP-1 [C4]	450	1.19185e-05	6.06648e-05	3	Not Found	High	Not Found	Peak Found	High	High
[R].LLPLPSCLPALASSQVK.[R]	Q96D70	R3HDM4	R3H domain-containing protein 4	1xTP-1 [C7]	29	0.00754344	0.00100143	1	Not Found	Not Found	Not Found	Not Found	High	Not Found
[R].LLSAACR.[L]	P49327	FASN	Fatty acid synthase	1xTP-1 [C6]	1186	0.0687398	0.00549183	3	High	High	Peak Found	Peak Found	High	Peak Found
[R].LLVPPLCIRPSVVSDLK.[S]	O14802	POLR3A	DNA-directed RNA polymerase III subunit RPC1	1xTP-1 [C7]	261	0.00187545	0.000265778	6	High	High	High	High	High	High
[R].LLVSMCQGNR.[D]	P20073	ANXA7	Annexin A7	1xTP-1 [C6]	327	0.0150526	0.00144184	1	Not Found	Not Found	Not Found	Not Found	High	Not Found
[R].LNFSTPTSTNIVSVCR.[A]	O15067	PFAS	Phosphoglycerate kinase 1	1xTP-1 [C15]	108	8.48645e-10	6.06648e-05	6	High	High	High	High	High	High
[R].LNKCGVISPR.[F]	P62244	RPS15A	40S ribosomal protein S15a	1xTP-1 [C4]	72	0.0951656	0.00741467	4	High	Peak Found	High	Peak Found	High	High
[R].LNPQEYLTSTACR.[R]	Q8TAQ2	SMARCC2	SWI/SNF complex subunit SMARCC2	1xTP-1 [C12]	511	0.0102284	0.00109138	1	Not Found	Not Found	Peak Found	Not Found	Not Found	High
[R].LPITCLTIPPR.[F]	P53350	PLK1	Serine/threonine-protein kinase PLK1	1xTP-1 [C5]	318	0.110523	0.0082794	4	High	High	Peak Found	Peak Found	High	High
[R].LPLMECVQVTK.[D]	P08237	PFKM	ATP-dependent 6-ph	1xTP-1 [C6]	351	0.0526473	0.00430082	1	Peak Found	High	Peak Found	Peak Found	Peak Found	Peak Found
[R].LPPDRYCLTAPNYR.[L]	Q9HBM6	TAF9B	Transcription initiation factor TFIID subunit 9B	1xTP-1 [C7]	121	0.000671911	0.000126086	3	High	Not Found	Not Found	High	Peak Found	High
[R].LPPQSCLLLPPTPVR.[G]	O75691	UTP20	Small subunit processome component 20 homolog	1xTP-1 [C6]	2058	0.00268391	0.000388332	1	Not Found	Peak Found	Peak Found	Not Found	High	Not Found
[R].LPPSGSKPVAASTCSGK.[K]	O43663	PRC1	Protein regulator of cytokinesis 1	1xTP-1 [C14]	531	0.0945484	0.00741467	2	Peak Found	Peak Found	Peak Found	Peak Found	High	High
[R].LQGINCGPDFTPSFANLGR.[T]	Q04637	EIF4G1	Eukaryotic translation initiation factor 4 gamma 1	1xTP-1 [C6]	662	5.27555e-09	6.06648e-05	6	High	High	High	High	High	High
[R].LSCFAQTVSPAEK.[W]	Q16658	FSCN1	Fascin	1xTP-1 [C3]	121	0.000206424	6.06648e-05	5	Peak Found	High	High	High	High	High
[R].LSCLPAFKDLIAK.[V]	Q14204	DYNC1H1	Cytoplasmic dynein 1 heavy chain 1	1xTP-1 [C3]	3940	0.0148667	0.00144184	1	Not Found	Not Found	Not Found	Not Found	High	Not Found
[R].LSCPITALGR.[T]	Q8IY37	DHX37	Probable ATP-dependent RNA helicase DHX37	1xTP-1 [C3]	766	0.000888769	0.000126086	5	Peak Found	High	High	High	High	High
[R].LSGGLGAGSCR.[L]	Q04695	KRT17	Keratin, type I cyt	1xTP-1 [C10]	40	0.00135983	0.000126086	6	High	High	High	High	High	High
[R].LSIPTYGLQCTR.[A]	P49327	FASN	Fatty acid synthase	1xTP-1 [C10]	2273	0.000154306	6.06648e-05	4	High	High	Peak Found	High	Peak Found	High
[R].LSSPCIMVVNHDASSIPR.[L]	Q08J23	NSUN2	RNA cytosine C(5)-methyltransferase NSUN2	1xTP-1 [C5]	235	5.14858e-09	6.06648e-05	4	High	Not Found	High	Not Found	High	High
[R].LTEGCSFR.[R]	Q71UM5	RPS27L	40S ribosomal protein S27-like	1xTP-1 [C5]	77	0.034787	0.00314487	1	High	Not Found	Not Found	Not Found	Not Found	Not Found
[R].LVCLLPSSQAR.[Q]	Q9Y4F3	MARF1	Meiosis regulator and mRNA stability factor 1	1xTP-1 [C3]	936	0.0128169	0.00128937	1	Not Found	Not Found	High	Not Found	Not Found	Not Found
[R].LVHLPSCTVFSNFPVIK.[N]	Q9Y5J1	UTP18	U3 small nucleolar RNA-associated protein 18 homolog	1xTP-1 [C7]	507	0.000133392	6.06648e-05	4	High	High	High	Not Found	High	Not Found
[R].LVQAFQFTDKHGEVCPAGWKPGSDTIKPDVQK.[S]	Q06830	PRDX1	Peroxiredoxin-1	1xTP-1 [C15]	173	1.20012e-07	6.06648e-05	6	High	High	High	High	High	High
[R].LVVPASQCGSLIGK.[G]	Q15366	PCBP2	Poly(rC)-binding protein 2	1xTP-1 [C8]	109	0.00038004	6.06648e-05	8	High	High	High	High	High	High
[R].LVVPATQCGSLIGK.[G]	Q15365	PCBP1	Poly(rC)-binding protein 1	1xTP-1 [C8]	109	0.00125973	0.000126086	6	High	High	High	High	High	High
[R].MAAAGGTVSGPSSACKPGR.[S]	Q9ULT8	HECTD1	E3 ubiquitin-protein ligase HECTD1	1xOxidation [M1]; 1xTP-1 [C15]	254	0.00263797	0.000388332	5	Peak Found	High	High	Not Found	High	High
[R].MCHNVNR.[V]	P49915	GMPS	GMP synthase [glutamine-hydrolyzing]	1xTP-1 [C2]	554	0.012896	0.00128937	9	High	High	High	Peak Found	High	High
[R].MCHNVNR.[V]	P49915	GMPS	GMP synthase [glutamine-hydrolyzing]	1xOxidation [M1]; 1xTP-1 [C2]	554	0.0921194	0.00732902	4	High	High	Peak Found	Peak Found	High	High
[R].MCTVIKR.[Q]	Q9BZE4	GTPBP4	Nucleolar GTP-binding protein 1	1xTP-1 [C2]	138	0.065679	0.00531325	3	Peak Found	High	High	Peak Found	High	Peak Found
[R].MGPSYCLPPTFPK.[A]	O15067	PFAS	Phosphoglycerate kinase 1	1xTP-1 [C6]	1044	0.0175972	0.00168587	1	Peak Found	Not Found	Peak Found	Not Found	High	Peak Found
[R].MRPGVACSVSQAQK.[D]	P32969	RPL9	60S ribosomal protein L9	1xTP-1 [C7]	134	0.00912367	0.00109138	1	High	Not Found	Not Found	Not Found	Not Found	Not Found
[R].MRPGVACSVSQAQK.[D]	P32969	RPL9	60S ribosomal protein L9	1xOxidation [M1]; 1xTP-1 [C7]	134	0.000121781	6.06648e-05	6	High	High	High	High	High	High
[R].MSASQLEALCPQVINAALALAAKPQSK.[L]	P35221	CTNNA1	Catenin alpha-1	1xTP-1 [C10]	461	1.91823e-07	6.06648e-05	2	Not Found	Not Found	High	High	Not Found	Not Found
[R].NIDPKPCTPR.[G]	Q96EP5	DAZAP1	DAZ-associated protein 1	1xTP-1 [C7]	85	0.114917	0.00844532	1	Peak Found	Peak Found	High	Peak Found	Peak Found	Peak Found
[R].NIQACKELAQTTR.[T]	P50990	CCT8	T-complex protein 1 subunit theta	1xTP-1 [C5]	36	0.00292566	0.000454455	2	High	Not Found	Not Found	High	Not Found	Not Found
[R].NIYYLCAPNR.[H]	Q12931	TRAP1	Heat shock protein 75 kDa, mitochondrial	1xTP-1 [C6]	501	0.00874976	0.00109138	5	High	High	High	High	Peak Found	High
[R].NLQDAMQVCR.[N]	P49368	CCT3	T-complex protein 1 subunit gamma	1xTP-1 [C9]	398	9.6679e-05	6.06648e-05	3	Peak Found	Peak Found	Peak Found	High	High	High
[R].NLSGQPNFPCR.[V]	Q9HD45	TM9SF3	Transmembrane 9 superfamily member 3	1xTP-1 [C10]	428	0.000230196	6.06648e-05	1	Not Found	Not Found	Not Found	Not Found	Not Found	High
[R].NSCNVGGGGGGFKHPAFK.[R]	Q7L2J0	MEPCE	7SK snRNA methylph	1xTP-1 [C3]	153	0.00702902	0.000949718	5	High	High	Peak Found	High	High	High
[R].NSVCIIPLR.[R]	O43818	RRP9	U3 small nucleolar RNA-interacting protein 2	1xTP-1 [C4]	460	0.0373444	0.00331644	1	Peak Found	Peak Found	Peak Found	High	Peak Found	Peak Found
[R].NTGIICTIGPASR.[S]	P14618	PKM	Pyruvate kinase PKM	1xTP-1 [C6]	49	1.89319e-05	6.06648e-05	7	High	High	High	High	High	High
[R].QAFPNTNRWFLTCINQPQFR.[A]	P26641	EEF1G	Elongation factor 1-gamma	1xTP-1 [C13]	194	0.000554913	6.06648e-05	4	High	High	High	High	Not Found	Not Found
[R].QLCDNAGFDATNILNK.[L]	Q99832	CCT7	T-complex protein 1 subunit eta	1xTP-1 [C3]	450	5.66974e-06	6.06648e-05	4	High	High	High	High	Not Found	Not Found
[R].QLPSLACKYPVSSR.[E]	P42166	TMPO	Lamina-associated polypeptide 2, isoform alpha	1xTP-1 [C7]	518	5.6011e-06	6.06648e-05	7	High	High	High	High	High	High
[R].QSCATVQR.[L]	O00273	DFFA	DNA fragmentation factor subunit alpha	1xTP-1 [C3]	165	0.0283248	0.0026736	3	High	High	Peak Found	Peak Found	High	Peak Found
[R].RAPSVANVGSHCDLSLK.[I]	P21333	FLNA	Filamin-A	1xTP-1 [C12]	2160	0.00132823	0.000126086	2	Not Found	Peak Found	Peak Found	Not Found	High	High
[R].RCLYASVLTAQPR.[L]	P13639	EEF2	Elongation factor 2	1xTP-1 [C2]	728	0.000328836	6.06648e-05	1	Not Found	Peak Found	Not Found	Peak Found	Peak Found	High
[R].RGNVCGDSK.[S]	Q05639	EEF1A2	Elongation factor 1-alpha 2	1xTP-1 [C5]	326	0.12914	0.00927602	2	Peak Found	Peak Found	High	Peak Found	Peak Found	High
[R].RGPCIIYNEDNGIIK.[A]	P36578	RPL4	60S ribosomal protein L4	1xTP-1 [C4]	208	7.17757e-05	6.06648e-05	2	High	High	Peak Found	Peak Found	Peak Found	Not Found
[R].RPKPLVDPACITSIQPGAPK.[T]	O96013	PAK4	Serine/threonine-protein kinase PAK 4	1xTP-1 [C10]	58	5.95517e-07	6.06648e-05	3	High	Not Found	Not Found	Not Found	High	High
[R].RYPNVFGIGDCTNLPTSK.[T]	Q9Y6N5	SQOR	Sulfide:quinone oxidoreductase, mitochondrial	1xTP-1 [C11]	337	4.03408e-08	6.06648e-05	5	High	Peak Found	High	High	High	High
[R].SCKPKPIGK.[L]	P11586	MTHFD1	C-1-tetrahydrofolate synthase, cytoplasmic	1xTP-1 [C2]	326	0.00422285	0.000753666	6	High	High	High	High	High	High
[R].SDRHNLLQACK.[M]	Q14683	SMC1A	Structural maintenance of chrom	1xTP-1 [C10]	933	4.12639e-05	6.06648e-05	3	Not Found	High	High	Peak Found	High	Peak Found
[R].SFDVNKPGCEVDDLKGGVAGGSILK.[G]	P41091	EIF2S3	Eukaryotic translation initiation factor 2 subunit 3	1xTP-1 [C9]	269	3.17627e-05	6.06648e-05	2	Not Found	High	Not Found	Not Found	High	Not Found
[R].SGIECQLWR.[S]	P00734	F2	Prothrombin	1xTP-1 [C5]	129	0.0328293	0.00310692	3	Not Found	High	Peak Found	Not Found	High	High
[R].SGKVAFRDCEGR.[Y]	Q16658	FSCN1	Fascin	1xTP-1 [C9]	226	0.0897529	0.0072515	1	Peak Found	Not Found	Peak Found	Peak Found	Peak Found	High
[R].SGQGAFGNMCR.[G]	P36578	RPL4	60S ribosomal protein L4	1xTP-1 [C10]	96	0.000169004	6.06648e-05	6	High	High	High	High	High	High
[R].SGQGAFGNMCR.[G]	P36578	RPL4	60S ribosomal protein L4	1xOxidation [M9]; 1xTP-1 [C10]	96	0.0036801	0.000637478	2	Not Found	High	Not Found	Not Found	Not Found	High
[R].SHFEQWGTLTDCVVMRDPNTK.[R]	P09651	HNRNPA1	Heterogeneous nuclear ribonucleoprotein A1	1xOxidation [M15]; 1xTP-1 [C12]	43	3.93699e-08	6.06648e-05	2	Peak Found	High	Not Found	Peak Found	High	Not Found
[R].SILSPGGSCGPIK.[V]	P78347	GTF2I	General transcription factor II-I	1xTP-1 [C9]	215	0.000129404	6.06648e-05	3	Not Found	Not Found	Not Found	High	High	High
[R].SIQFVDWCPTGFK.[V]	P68366	TUBA4A	Tubulin alpha-4A chain	1xTP-1 [C8]	347	6.83677e-05	6.06648e-05	3	High	Peak Found	Peak Found	High	High	Peak Found
[R].SIQFVDWCPTGFKVGINYQPPTVVPGGDLAK.[V]	P68366	TUBA4A	Tubulin alpha-4A chain	1xTP-1 [C8]	347	0.000212772	6.06648e-05	2	Not Found	Not Found	High	High	Not Found	Not Found
[R].SISLTRPGSSSLSSGPNSILCR.[G]	Q9HB19	PLEKHA2	Pleckstrin homology domain-containing family A member 2	1xTP-1 [C21]	332	7.86294e-05	6.06648e-05	2	Not Found	Not Found	Not Found	Not Found	High	High
[R].SKGFGFVCFSSPEEATK.[A]	Q13310	PABPC4	Polyadenylate-binding protein 4	1xTP-1 [C8]	339	0.00045523	6.06648e-05	1	Not Found	Not Found	Not Found	Not Found	Not Found	High
[R].SLHDALCVLAQTVK.[D]	P78371	CCT2	T-complex protein 1 subunit beta	1xTP-1 [C7]	395	0.00135186	0.000126086	2	Peak Found	High	High	Not Found	Peak Found	Peak Found
[R].SLHDALCVLAQTVKDSR.[T]	P78371	CCT2	T-complex protein 1 subunit beta	1xTP-1 [C7]	395	0.000296758	6.06648e-05	2	Not Found	High	Not Found	Not Found	Not Found	High
[R].SLHDALCVVKR.[V]	P17987	TCP1	T-complex protein 1 subunit alpha	1xTP-1 [C7]	397	0.000413467	6.06648e-05	4	High	Peak Found	High	Peak Found	High	High
[R].SLLPGCQSVISR.[L]	O95571	ETHE1	Persulfide dioxygenase ETHE1, mitochondrial	1xTP-1 [C6]	98	0.00014347	6.06648e-05	5	High	High	High	Peak Found	High	High
[R].SLVEASSSGVSVLSLCEK.[G]	Q9UQ80	PA2G4	Proliferation-associated protein 2G4	1xTP-1 [C16]	49	0.000266169	6.06648e-05	2	Peak Found	Not Found	Peak Found	Not Found	High	High
[R].SNINGKQCGDK.[I]	Q8IYD9	LAS2	Lung adenoma susceptibility protein 2	1xTP-1 [C8]	196	0.0814087	0.0067224	2	High	Peak Found	Peak Found	Peak Found	High	Peak Found
[R].SPYTVTVGQACNPSACR.[A]	P21333	FLNA	Filamin-A	1xCarbamidomethyl [C16]; 1xTP-1 [C11]	478	9.45642e-06	6.06648e-05	3	High	Not Found	Not Found	High	Not Found	High
[R].SRHCPYLDTINR.[S]	Q53GS9	USP39	U4/U6.U5 tri-snRNP-associated protein 2	1xTP-1 [C4]	105	0.00795572	0.0010605	1	Not Found	Not Found	High	Not Found	Peak Found	Not Found
[R].SSSTGSSSSTGGGGQESQPSPLALLAATCSR.[I]	P08047	SP1	Transcription factor Sp1	1xTP-1 [C29]	68	0.0359263	0.00318806	1	High	Not Found	Not Found	Not Found	Not Found	Not Found
[R].SVHYCPATK.[K]	P25205	MCM3	DNA replication licensing factor MCM3	1xTP-1 [C5]	148	0.114917	0.00844532	1	Peak Found	Peak Found	High	Peak Found	Peak Found	Peak Found
[R].SVLDAAQIVGLNCLR.[L]	Q92598	HSPH1	Heat shock protein 105 kDa	1xTP-1 [C13]	167	0.00632641	0.000904544	3	High	Not Found	High	Not Found	Not Found	High
[R].SVSCPLLSR.[D]	Q9H6S3	EPS8L2	Epidermal growth factor receptor kinase substrate 8-like protein 2	1xTP-1 [C4]	369	0.0260651	0.00242546	1	Peak Found	Peak Found	Peak Found	High	Peak Found	Peak Found
[R].TAICNLILGNPPSK.[V]	Q9NRX1	PNO1	RNA-binding protein PNO1	1xTP-1 [C4]	226	6.76495e-06	6.06648e-05	5	High	High	High	Peak Found	High	High
[R].TCLGPK.[S]	P49368	CCT3	T-complex protein 1 subunit gamma	1xTP-1 [C2]	40	0.0970416	0.00749758	4	High	Peak Found	High	High	Peak Found	High
[R].TGCIGAK.[H]	P62913	RPL11	60S ribosomal protein L11	1xTP-1 [C3]	150	0.050307	0.0042136	3	Peak Found	High	Not Found	Not Found	High	High
[R].TGSQGQCTQVR.[V]	P62857	RPS28	40S ribosomal protein S28	1xTP-1 [C7]	27	0.0021184	0.000388332	9	High	High	High	High	High	High
[R].THPSAAVPVCPR.[S]	Q3KQU3	MAP7D1	MAP7 domain-containing protein 1	1xTP-1 [C10]	361	0.114917	0.00844532	1	Not Found	Not Found	Not Found	Not Found	High	Not Found
[R].TIQFVDWCPTGFK.[V]	Q71U36	TUBA1A	Tubulin alpha-1A chain	1xTP-1 [C8]	347	0.00163067	0.000195391	2	High	Peak Found	High	Peak Found	Peak Found	Peak Found
[R].TLIQNCGASTIR.[L]	P49368	CCT3	T-complex protein 1 subunit gamma	1xTP-1 [C6]	455	3.1188e-05	6.06648e-05	5	High	High	High	Not Found	High	High
[R].TLLLCGYPNVGK.[S]	Q9BZE4	GTPBP4	Nucleolar GTP-binding protein 1	1xTP-1 [C5]	174	0.00698788	0.000949718	5	Peak Found	High	High	High	High	High
[R].TLQCLNAVR.[T]	Q5SRE5	NUP188	Nucleoporin NUP188	1xTP-1 [C4]	1433	0.13954	0.0096951	3	High	Peak Found	High	Peak Found	Peak Found	High
[R].TLQSLACGK.[A]	Q13620	CUL4B	Cullin-4B	1xTP-1 [C7]	633	0.00355572	0.000637478	1	Not Found	Peak Found	Peak Found	Peak Found	High	Peak Found
[R].TLSGMESYCVR.[A]	P50991	CCT4	T-complex protein 1 subunit delta	1xTP-1 [C9]	450	0.0130557	0.00128937	3	Peak Found	Peak Found	High	Peak Found	High	High
[R].TLSIAPGQCRPPR.[V]	Q53EP0	FNDC3B	Fibronectin type III domain-containing protein 3B	1xTP-1 [C9]	674	0.000413467	6.06648e-05	3	High	High	Peak Found	High	Peak Found	Peak Found
[R].TNLLQVCER.[I]	P18206	VCL	Vinculin	1xTP-1 [C7]	1053	0.0595711	0.00489815	1	Peak Found	Peak Found	Peak Found	Peak Found	Peak Found	High
[R].TPCSSLLPLLNAHAATSGK.[Q]	Q9NUQ6	SPATS2L	SPATS2-like protein	1xTP-1 [C3]	367	0.000182864	6.06648e-05	1	Not Found	High	Not Found	Not Found	Not Found	Not Found
[R].TPPLLENSLPQCYQR.[V]	Q8NEW0	SLC30A7	Zinc transporter 7	1xTP-1 [C12]	308	8.17059e-06	6.06648e-05	2	Peak Found	High	Peak Found	Peak Found	High	Peak Found
[R].TPSVSAPLALSCPR.[Q]	Q9UGP4	LIMD1	LIM domain-containing protein 1	1xTP-1 [C12]	305	0.114917	0.00844532	1	Not Found	High	Not Found	Not Found	Not Found	Not Found
[R].TSAVPSPCGK.[Y]	P49748	ACADVL	Very long-chain specific acyl-CoA dehydrogenase, mitochondrial	1xTP-1 [C8]	237	0.00205793	0.000388332	1	Peak Found	Peak Found	Peak Found	Peak Found	Not Found	High
[R].TSGVVTSCTGVLPQLSMVK.[Y]	P49736	MCM2	DNA replication licensing factor MCM2	1xTP-1 [C8]	315	0.002378	0.000388332	1	Not Found	Not Found	High	Not Found	Not Found	Not Found
[R].TSGVVTSCTGVLPQLSMVK.[Y]	P49736	MCM2	DNA replication licensing factor MCM2	1xOxidation [M17]; 1xTP-1 [C8]	315	5.94432e-05	6.06648e-05	3	Not Found	High	High	Not Found	Not Found	High
[R].TTHYTPLACGSNPLKR.[E]	O60832	DKC1	H/ACA ribonucleoprotein complex subunit DKC1	1xTP-1 [C9]	74	1.29942e-08	6.06648e-05	6	High	High	High	High	High	High
[R].TVSGTCGPGQPASSSGGPGRPISGSVSSARPLGSSR.[G]	Q68D10	SPTY2D1	Protein SPT2 homolog	1xTP-1 [C6]	433	0.000115304	6.06648e-05	5	High	High	High	High	Peak Found	High
[R].VAAAESMPLLLECAR.[V]	O00410	IPO5	Importin-5	1xTP-1 [C13]	733	0.000743579	0.000126086	2	Not Found	Not Found	High	High	Not Found	Peak Found
[R].VAAAESMPLLLECAR.[V]	O00410	IPO5	Importin-5	1xOxidation [M7]; 1xTP-1 [C13]	733	0.00462914	0.000852955	1	Not Found	Not Found	Not Found	High	Not Found	Not Found
[R].VAGINACGR.[G]	P51610	HCFC1	Host cell factor 1	1xTP-1 [C7]	1872	0.00998431	0.00109138	2	Not Found	High	Not Found	Not Found	Not Found	High
[R].VATIQQCQSPTNYLQGLDGKPIIAAPVFTK.[M]	Q86TC9	MYPN	Myopalladin	1xTP-1 [C7]	416	0.0264003	0.00242546	1	Not Found	Not Found	Not Found	Not Found	Not Found	High
[R].VAVVCSSNQNR.[S]	Q9NP77	SSU72	RNA polymerase II subunit A C-terminal domain ph	1xTP-1 [C5]	12	0.0147746	0.00144184	2	Peak Found	High	Peak Found	Peak Found	Peak Found	High
[R].VDTCHTPFGKR.[L]	P52701	MSH6	DNA mismatch repair protein Msh6	1xTP-1 [C4]	765	0.00149367	0.000126086	8	High	High	High	High	High	High
[R].VFANAPDSACVIGLK.[K]	P17858	PFKL	ATP-dependent 6-ph	1xTP-1 [C10]	708	0.000120311	6.06648e-05	2	Peak Found	Peak Found	Peak Found	Peak Found	High	High
[R].VFVLPCIQQIQR.[I]	O75955	FLOT1	Flotillin-1	1xTP-1 [C6]	34	0.147847	0.00988508	1	Peak Found	Peak Found	Peak Found	Not Found	High	Peak Found
[R].VGAFTMVCK.[D]	P00505	GOT2	Aspartate aminotransferase, mitochondrial	1xTP-1 [C8]	295	0.00208192	0.000388332	4	High	High	Peak Found	Not Found	High	High
[R].VGAFTMVCK.[D]	P00505	GOT2	Aspartate aminotransferase, mitochondrial	1xOxidation [M6]; 1xTP-1 [C8]	295	0.0246104	0.00222929	1	Peak Found	Peak Found	Not Found	Peak Found	High	Peak Found
[R].VGIIPPKGCLLYGPPGTGK.[T]	P62333	PSMC6	26S proteasome regulatory subunit 10B	1xTP-1 [C9]	170	7.73482e-06	6.06648e-05	13	High	High	High	High	High	High
[R].VIGSGCNLDSAR.[F]	P07195	LDHB	L-lactate dehydrogenase B chain	1xTP-1 [C6]	163	4.57609e-05	6.06648e-05	6	High	High	High	High	High	High
[R].VIPSFMCQAGDFTNHNGTGGK.[S]	P30405	PPIF	Peptidyl-prolyl cis-trans isomerase F, mitochondrial	1xTP-1 [C7]	104	8.2267e-08	6.06648e-05	6	High	High	High	High	High	High
[R].VIVCNTK.[L]	P17931	LGALS3	Galectin-3	1xTP-1 [C4]	173	0.150715	0.00988508	4	Peak Found	High	High	Peak Found	High	High
[R].VIVKCPTSGR.[L]	Q9ULA0	DN	Aspartyl aminopeptidase	1xTP-1 [C5]	154	0.0168417	0.00158855	2	Peak Found	Peak Found	Peak Found	Peak Found	High	High
[R].VLCPSNSSQR.[V]	O14965	AURKA	Aurora kinase A	1xTP-1 [C3]	49	0.0156255	0.00154265	1	Not Found	Not Found	High	Peak Found	Peak Found	Peak Found
[R].VLGDVPGACTPVVPTRIPAIVSLSR.[G]	Q9UHR6	ZNHIT2	Zinc finger HIT domain-containing protein 2	1xTP-1 [C9]	188	0.14226	0.00973359	4	High	High	Not Found	High	High	Not Found
[R].VLGFSEPTVVTAALNCVGK.[G]	O43395	PRPF3	U4/U6 small nuclear ribonucleoprotein Prp3	1xTP-1 [C16]	37	0.0207313	0.00194095	1	Not Found	Peak Found	Peak Found	High	Peak Found	Peak Found
[R].VLGPAACR.[N]	Q7Z6Z7	HUWE1	E3 ubiquitin-protein ligase HUWE1	1xTP-1 [C7]	1879	0.0957869	0.00749758	1	Not Found	Not Found	Not Found	Not Found	High	Not Found
[R].VLVTQQFPCQNPLPVNSGQAQR.[V]	O14965	AURKA	Aurora kinase A	1xTP-1 [C9]	33	4.06001e-09	6.06648e-05	2	Not Found	Not Found	Not Found	Not Found	High	High
[R].VMTIPYQPMPASSPVICAGGQDR.[C]	Q15365	PCBP1	Poly(rC)-binding protein 1	2xOxidation [M2; M9]; 1xTP-1 [C17]	194	1.12921e-07	6.06648e-05	2	Not Found	High	Not Found	Not Found	Not Found	High
[R].VMTIPYQPMPASSPVICAGGQDR.[C]	Q15365	PCBP1	Poly(rC)-binding protein 1	1xTP-1 [C17]	194	2.23725e-12	6.06648e-05	4	High	Not Found	High	Not Found	High	High
[R].VMTIPYQPMPASSPVICAGGQDR.[C]	Q15365	PCBP1	Poly(rC)-binding protein 1	1xOxidation [M2]; 1xTP-1 [C17]	194	6.15099e-13	6.06648e-05	5	High	High	High	Not Found	High	High
[R].VNCLAPGLIK.[T]	Q9BTZ2	DHRS4	Dehydrogenase/reductase SDR family member 4	1xTP-1 [C3]	209	0.00593406	0.000904544	2	High	Peak Found	Peak Found	Peak Found	High	Peak Found
[R].VPECLYTLPSLR.[R]	Q13045	FLII	Protein flightless-1 homolog	1xTP-1 [C4]	241	0.00374391	0.000698603	3	Peak Found	High	Peak Found	Peak Found	High	High
[R].VPFLVLECPNLK.[L]	Q9NRP0	OSTC	Oligosaccharyltransferase complex subunit OSTC	1xTP-1 [C8]	14	0.0332543	0.00310692	2	Peak Found	Not Found	High	High	Peak Found	Peak Found
[R].VPTANVSVVDLTCR.[L]	P04406	GAPDH	Glyceraldehyde-3-ph	1xTP-1 [C13]	247	0.000146106	6.06648e-05	1	High	Peak Found	Peak Found	Peak Found	Peak Found	Peak Found
[R].VPYPRPGMCPSK.[T]	Q13214	SEMA3B	Semaphorin-3B	1xTP-1 [C9]	380	0.0121281	0.00124196	1	Not Found	Not Found	Not Found	Not Found	Not Found	High
[R].VQEVPKLKVCALR.[V]	Q07020	RPL18	60S ribosomal protein L18	1xTP-1 [C10]	101	0.0798354	0.00654825	1	Not Found	High	Not Found	Not Found	Not Found	Not Found
[R].VRNCSSPEFSK.[T]	Q99829	CPNE1	Copine-1	1xTP-1 [C4]	53	0.147847	0.00988508	4	High	Peak Found	High	High	Peak Found	High
[R].VRPCVVYGGADIGQQIR.[D]	O00571	DDX3X	ATP-dependent RNA helicase DDX3X	1xTP-1 [C4]	298	5.99347e-08	6.06648e-05	2	Peak Found	Peak Found	Peak Found	High	High	Peak Found
[R].VSFCAPGPPGR.[S]	Q8IY67	RAVER1	Ribonucleoprotein PTB-binding 1	1xTP-1 [C4]	297	0.000971438	0.000126086	5	High	Peak Found	High	High	High	High
[R].VSGGLEVLAEKCPNLTHLNLSGNK.[I]	P39687	ANP32A	Acidic leucine-rich nuclear phosphoprotein 32 family member A	1xTP-1 [C12]	87	2.19674e-12	6.06648e-05	3	High	High	Peak Found	Peak Found	High	Peak Found
[R].VTAVIPCFPYAR.[Q]	P11908	PRPS2	Ribose-phosphate pyrophosphokinase 2	1xTP-1 [C7]	91	2.23144e-05	6.06648e-05	5	High	High	High	High	Peak Found	High
[R].VTYCPTEPGNYIINIK.[F]	P21333	FLNA	Filamin-A	1xTP-1 [C4]	2107	2.53574e-05	6.06648e-05	3	Peak Found	High	High	Peak Found	Peak Found	High
[R].VVTQNICQYR.[S]	Q8N163	CCAR2	Cell cycle and apopt	1xTP-1 [C7]	754	0.0195848	0.00178851	1	Not Found	Not Found	Not Found	Not Found	Not Found	High
[R].WSSLACNIALDAVK.[M]	P49368	CCT3	T-complex protein 1 subunit gamma	1xTP-1 [C6]	173	0.00256309	0.000388332	1	Not Found	Not Found	Not Found	Not Found	Not Found	High
[R].YCTVPR.[D]	P55259	GP2	Pancreatic secretory granule membrane major glycoprotein GP2	1xTP-1 [C2]	177	0.0782924	0.00636313	1	Peak Found	Peak Found	Peak Found	Peak Found	Peak Found	High
[R].YGDGGSTFQSTTGHCVHMR.[G]	P31943	HNRNPH1	Heterogeneous nuclear ribonucleoprotein H	1xTP-1 [C15]	290	1.57713e-05	6.06648e-05	6	High	High	High	High	High	High
[R].YGDGGSTFQSTTGHCVHMR.[G]	P31943	HNRNPH1	Heterogeneous nuclear ribonucleoprotein H	1xOxidation [M18]; 1xTP-1 [C15]	290	0.0868804	0.00707814	2	Peak Found	High	Peak Found	High	Peak Found	Peak Found
[R].YHQIGSGKCEIKVAQPK.[E]	O14979	HNRNPDL	Heterogeneous nuclear ribonucleoprotein D-like	1xTP-1 [C9]	303	0.0669738	0.00549183	5	High	High	High	High	High	Peak Found
[R].YKDGVVTIGCVGFPNVGK.[S]	P36915	GNL1	Guanine nucleotide-binding protein-like 1	1xTP-1 [C10]	365	0.000382336	6.06648e-05	1	Not Found	Not Found	Not Found	Not Found	Not Found	High
[R].YLLGTSLARPCIAR.[K]	P00966	ASS1	Arginin	1xTP-1 [C11]	97	0.0315875	0.00296632	1	Not Found	Not Found	Not Found	High	Not Found	Not Found
[R].YMPQNPCIIATK.[T]	Q09028	RBBP4	Histone-binding protein RBBP4	1xOxidation [M2]; 1xTP-1 [C7]	138	0.0204706	0.00194095	4	Peak Found	Peak Found	Peak Found	High	High	High
[R].YNFFTGCPK.[A]	Q99832	CCT7	T-complex protein 1 subunit eta	1xTP-1 [C7]	364	0.028144	0.00262685	4	High	High	High	High	Peak Found	Peak Found
[R].YSQICAK.[VA]	Q5VTU8	ATP5F1EP2	ATP synthase subunit epsilon-like protein, mitochondrial	1xTP-1 [C5]	19	0.0710129	0.00582357	2	Peak Found	High	Peak Found	Peak Found	Peak Found	High
[R].YSVFRPGVLLCDR.[Q]	Q9BUP3	HTATIP2	Oxidoreductase HTATIP2	1xTP-1 [C11]	172	0.00401045	0.000753666	1	Not Found	High	Not Found	Not Found	Not Found	Not Found
[R].YVDIAIPCNNK.[G]	P08865	RPSA	40S ribosomal protein SA	1xTP-1 [C8]	163	0.0212632	0.00203653	1	Not Found	Peak Found	High	Peak Found	Not Found	Peak Found
[R].YVLCTAPR.[A]	P25205	MCM3	DNA replication licensing factor MCM3	1xTP-1 [C4]	360	0.074807	0.00609602	2	Not Found	High	Not Found	Not Found	High	Not Found
[R].YYTSASGDEMVSLKDYCTR.[M]	P07900	HSP90AA1	Heat shock protein HSP 90-alpha	1xTP-1 [C17]	481	0.000145222	6.06648e-05	1	Not Found	Not Found	High	Not Found	Not Found	Not Found
